# Supplementary material for: A tong-like fluorescence sensor for metal ions: perfect conformational switch of hinge sugar by pyrene stacking
Source: Royal Society of Chemistry journal article supplement (doi:10.1039/b411344f), 2004-01-01
Supplement: b411344f.pdf [file b411344f.pdf]

## Supporting Information

# A Tongs-like Fluorescence Sensor for Metal Ions: Perfect Conformational Switch of Hinge Sugar by a Pyrene Stacking

*Hideya Yuasa,\* Naofusa Miyagawa, Masatoshi Nakatani, Masayuki Izumi and Hironobu Hashimoto*

### Table of contents

|                                                                   |     |
|-------------------------------------------------------------------|-----|
| General experimental procedures                                   | S3  |
| General fluorescence experiments                                  | S4  |
| Figure S1. $^1\text{H}$ NMR of <b>5</b>                           | S5  |
| Figure S2. $^{13}\text{C}$ NMR of <b>5</b>                        | S6  |
| Figure S3. $^1\text{H}$ NMR of <b>2</b> in $\text{CDCl}_3$        | S7  |
| Figure S4. COSY spectrum of <b>2</b> in $\text{CDCl}_3$           | S8  |
| Figure S5. $^1\text{H}$ NMR of <b>2</b> in $\text{CD}_3\text{OD}$ | S9  |
| Figure S6. $^1\text{H}$ NMR of <b>2</b> in DMSO                   | S10 |
| Figure S7. COSY spectrum of <b>2</b> in DMSO                      | S11 |
| Figure S8. $^{13}\text{C}$ NMR of <b>2</b>                        | S12 |
| Figure S9. $^1\text{H}$ NMR of <b>7</b> in $\text{CDCl}_3$        | S13 |
| Figure S10. $^{13}\text{C}$ NMR of <b>7</b> in $\text{CDCl}_3$    | S14 |

|                                                                                                    |     |
|----------------------------------------------------------------------------------------------------|-----|
| Figure S11. $^1\text{H}$ NMR of <b>8<math>\alpha</math></b> in $\text{CDCl}_3$                     | S15 |
| Figure S12. $^{13}\text{C}$ NMR of <b>8<math>\alpha</math></b> in $\text{CDCl}_3$                  | S16 |
| Figure S13. $^1\text{H}$ NMR of <b>8<math>\beta</math></b> in $\text{CDCl}_3$                      | S17 |
| Figure S14. $^{13}\text{C}$ NMR of <b>8<math>\beta</math></b> in $\text{CDCl}_3$                   | S18 |
| Figure S15. $^1\text{H}$ NMR of <b>9</b> in $\text{CDCl}_3$                                        | S19 |
| Figure S16. $^{13}\text{C}$ NMR of <b>9</b> in $\text{CDCl}_3$                                     | S20 |
| Figure S17. $^1\text{H}$ NMR of <b>1</b> in $\text{CDCl}_3$                                        | S21 |
| Figure S18. $^1\text{H}$ NMR of <b>1</b> in acetone- $\text{d}_6$                                  | S22 |
| Figure S19. $^1\text{H}$ NMR of <b>1</b> in $\text{DMSO}-\text{d}_6$                               | S23 |
| Figure S20. $^1\text{H}$ NMR of <b>1</b> in $\text{DMF}-\text{d}_7$                                | S24 |
| Figure S21. $^{13}\text{C}$ NMR of <b>1</b> in $\text{CDCl}_3$                                     | S25 |
| Figure S22. $^1\text{H}$ NMR of <b>1</b> with $\text{ZnCl}_2$ in acetone- $\text{d}_6$             | S26 |
| Figure S23. $^{13}\text{C}$ NMR of <b>1</b> with $\text{ZnCl}_2$ in acetone- $\text{d}_6$          | S27 |
| Figure S24. COSY spectrum of <b>1</b> with $\text{ZnCl}_2$ in acetone- $\text{d}_6$                | S28 |
| Figure S25. HMQC spectrum of <b>1</b> with $\text{ZnCl}_2$ in acetone- $\text{d}_6$                | S29 |
| Figure S26. HMBC spectrum of <b>1</b> with $\text{ZnCl}_2$ in acetone- $\text{d}_6$                | S30 |
| Figure S27. $^1\text{H}$ NMR of <b>1</b> with $\text{Mg}(\text{ClO}_4)_2$ in acetone- $\text{d}_6$ | S31 |
| Figure S28. $^1\text{H}$ NMR of <b>1-Pt</b> in $\text{DMF}-\text{d}_7$                             | S32 |
| Figure S29. $^{13}\text{C}$ NMR of <b>1-Pt</b> in $\text{DMF}-\text{d}_7$                          | S33 |
| Figure S30. COSY spectrum of <b>1-Pt</b> in $\text{DMF}-\text{d}_7$                                | S34 |
| Figure S31. HMQC spectrum of <b>1-Pt</b> in $\text{DMF}-\text{d}_7$                                | S35 |
| Figure S32. HMBC spectrum of <b>1-Pt</b> in $\text{DMF}-\text{d}_7$                                | S36 |

### General experimental procedures.

All solvents and reagents used were reagent grade and, in cases where further purification was required, standard procedures (Perrin, D.D.; Armarego, W.L.; Perrin, D.R. *Purification of Laboratory Compounds*. 2nd ed. Pergamon Press, London. 1980.) were followed. Solution transfers where anhydrous conditions were required were done under dry argon using syringes. Thin-layer chromatograms (TLC) were performed on precoated silica gel Merck 60-F254 plates (Art 5715) and visualized by quenching of fluorescence and/or by charring after spraying with 1 %  $\text{CeSO}_4$ -1.5 %  $(\text{NH}_4)_6\text{Mo}_7\text{O}_{24}\cdot 4\text{H}_2\text{O}$ -10 %  $\text{H}_2\text{SO}_4$ . Column chromatography was performed on Merck Kieselgel 60 (Art 7734), Wako gel C-300, or Kanto Silica gel 60N (spherical, neutral) with the solvent systems specified

Optical rotations were determined with a Horiba SEPA-200 or JASCO DIP-4 polarimeter using 1 dm or 0.1 dm length cell.  $^1\text{H}$  NMR (1D, COSY, HMQC, and HMBC) spectra were recorded at 400 MHz (Varian Unity-400) or 270 MHz (JEOL EX-270). Internal tetramethylsilane ( $\delta$  0 ppm) was used as a standard in  $\text{CDCl}_3$  or solvents peaks were used as standards ( $\delta$  2.05 ppm in acetone- $\text{d}_6$ ,  $\delta$  2.50 ppm in  $\text{DMSO-}d_6$  or  $\delta$  2.75 in  $\text{DMF-}d_7$ ). Chemical shifts are expressed in ppm referenced to the solvent, as an internal standard. The multiplicity of signals is abbreviated as follows: s = singlet, d = doublet, dd = doublet of doublets, t = triplet, dt = doublet of triplets, ddd = doublet of doublets of doublets, br = broad signal, m = multiplet.  $^{13}\text{C}$  NMR spectra were recorded at 67.8 MHz (JEOL JNM-EX-270) or 100.6 MHz (Varian Unity-400) and solvents peaks were used as standards ( $\delta$  77.0 ppm in  $\text{CDCl}_3$ ,  $\delta$  29.8 ppm in acetone- $\text{d}_6$  or  $\delta$  29.76 in  $\text{DMF-}d_7$ ). High resolution mass spectra (HRMS) were recorded on Mariner Biospectrometry Workstation ESI-TOF MS. Fourier transform infrared spectrum was obtained with Shimadzu FTIR-8400S, in which a 10 mM solution in  $\text{CCl}_4$  was measured in a cell with 0.5 mm length.

### General fluorescence experiments.

Fluorescence spectra were recorded at 35°C on Shimadzu RF-5300PC fluorophotometer with excitation at 355 nm for **2** (1 µM) and 347 nm for **1** (1 µM), sampling intervals of 2 nm for **2** and 1 nm for **1**, excitation band widths of 3 nm for **2** and 1.5 nm for **1**, and an emission band width of 5.0 nm for both compounds. A cell with 10 mm width and 3 mm depth was used.

1) Titration: To a thermostated (35°C) solution of **1** (1 µM, 1 mL) were dropped appropriate amounts of the solution of a metal ion and **1** (1 µM), and fluorescence spectrum was recorded each at specified amounts of the metal ion. The titration results with ZnCl<sub>2</sub> and CdCl<sub>2</sub>·4H<sub>2</sub>O are shown in Figure 1 of the main text. The results with Mg(ClO<sub>4</sub>)<sub>2</sub> and MnCl<sub>2</sub>·4H<sub>2</sub>O were shown in Figure S34-35.

2) Time course: To a thermostated (35°C) solution of **1** (2 µM) in DMSO (500 µL) was added the solution of K<sub>2</sub>[PtCl<sub>4</sub>] (2 µM) in DMSO (500 µL), and fluorescence spectrum was recorded at appropriate time intervals. The result is shown in Figure 1 of the main text.

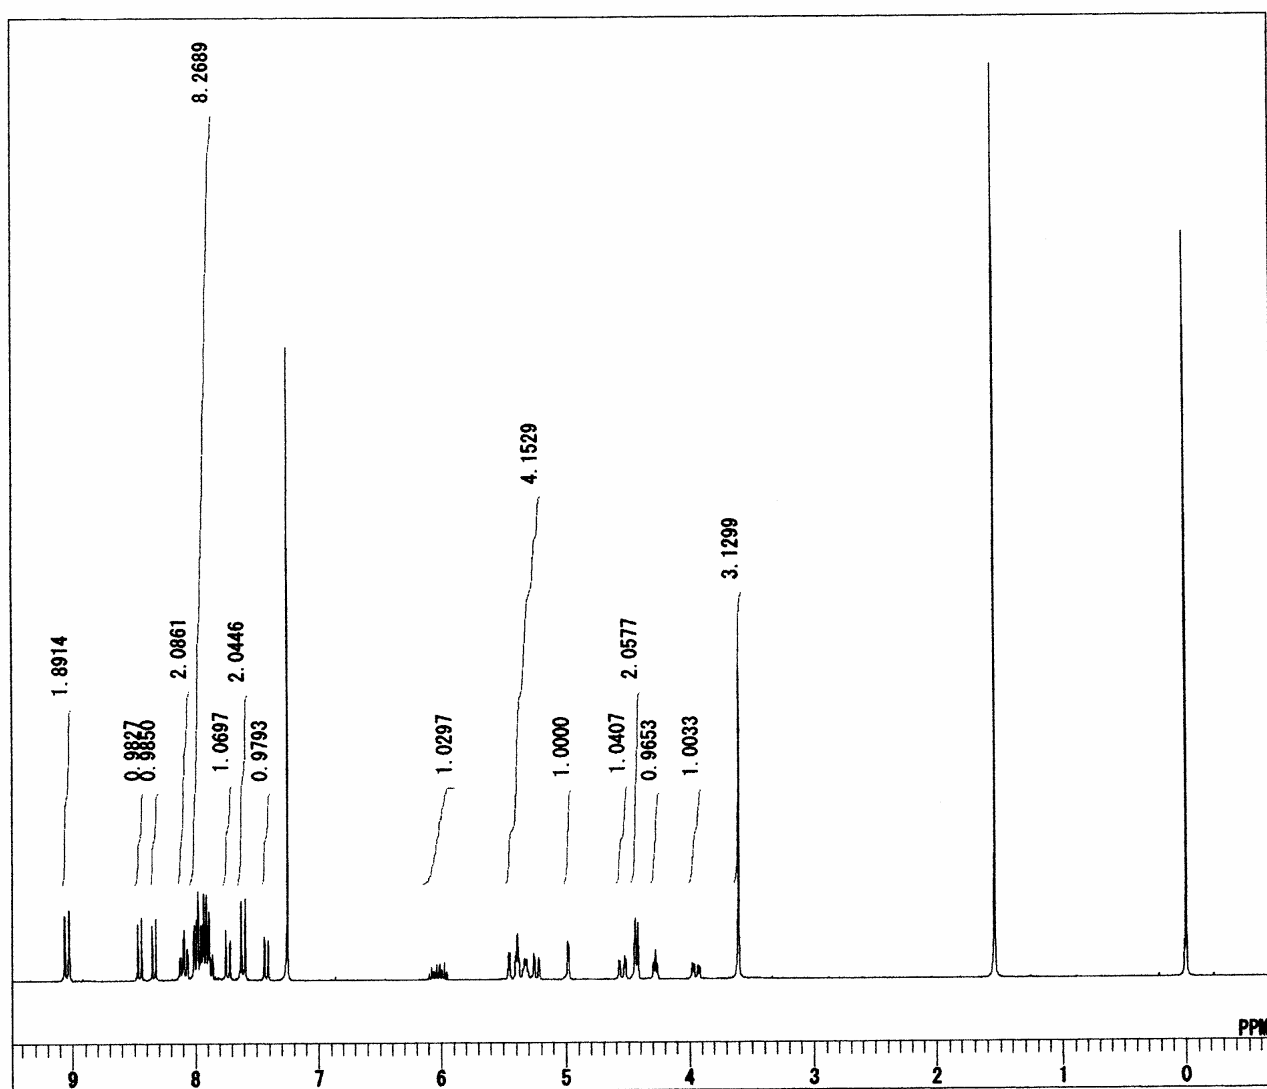

Figure S1. <sup>1</sup>H NMR of **5**.

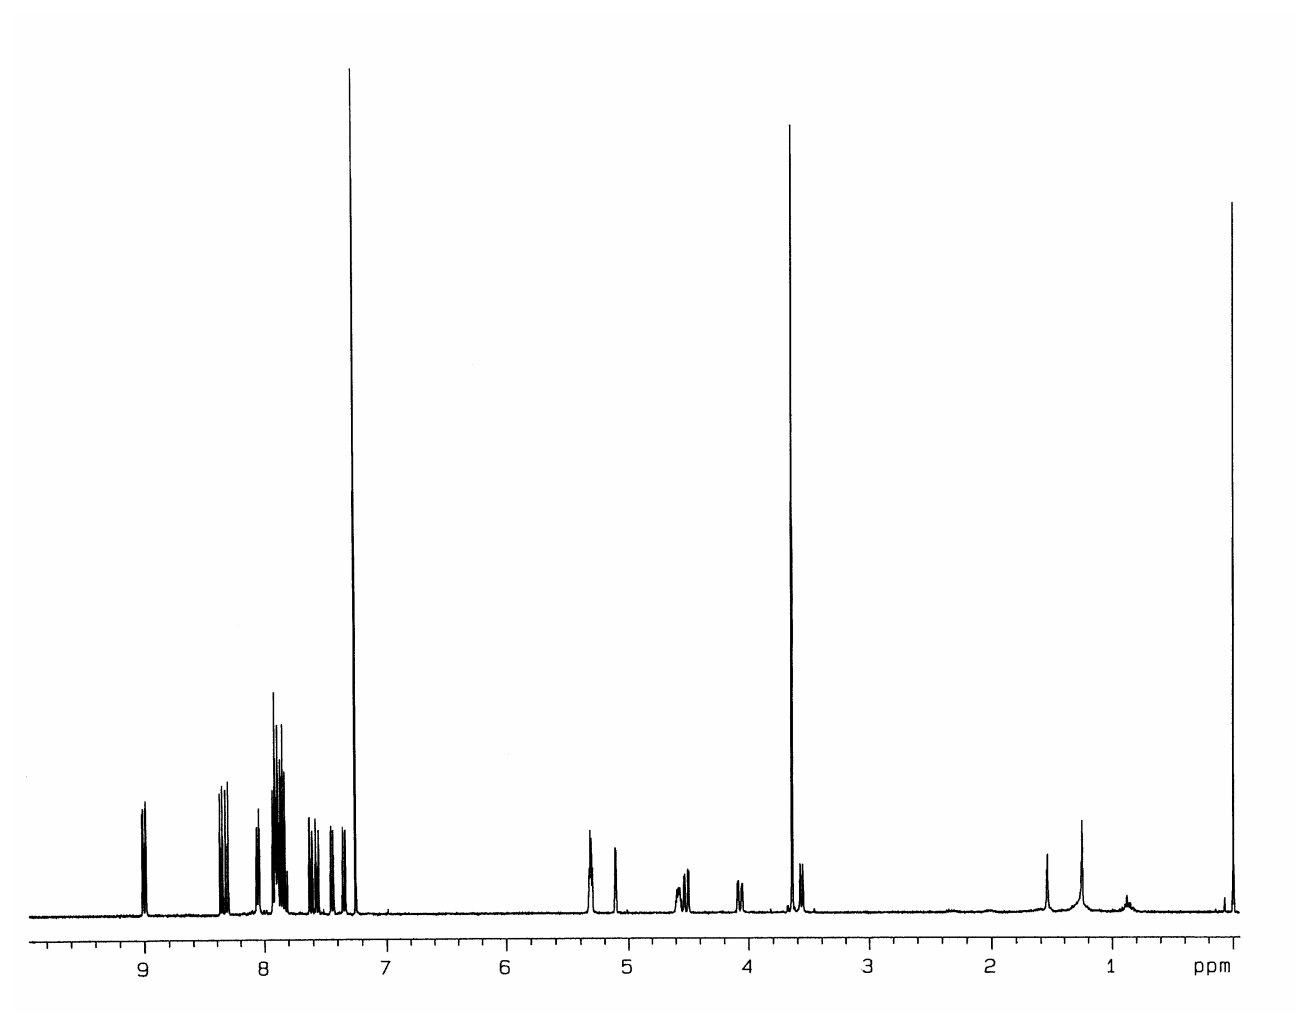

Figure S3.  $^1\text{H}$  NMR of **2** in  $\text{CDCl}_3$ .

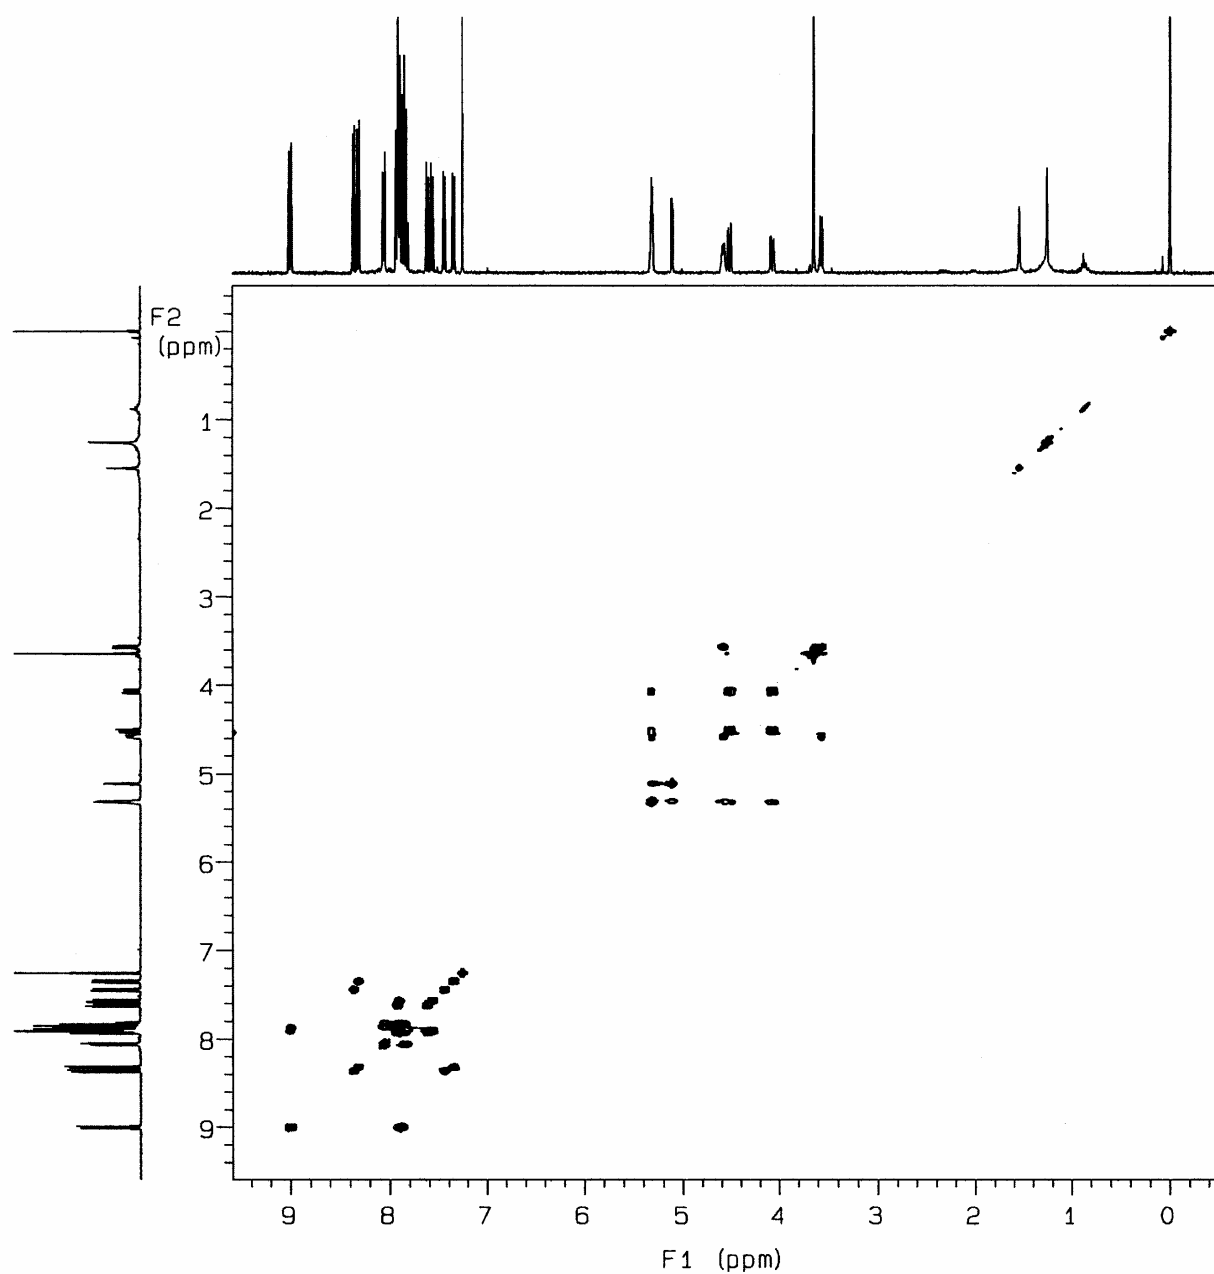

Figure S4. COSY spectrum of **2** in  $\text{CDCl}_3$ .

Supplementary Material for Organic & Biomolecular Chemistry

This journal is © The Royal Society of Chemistry 2004

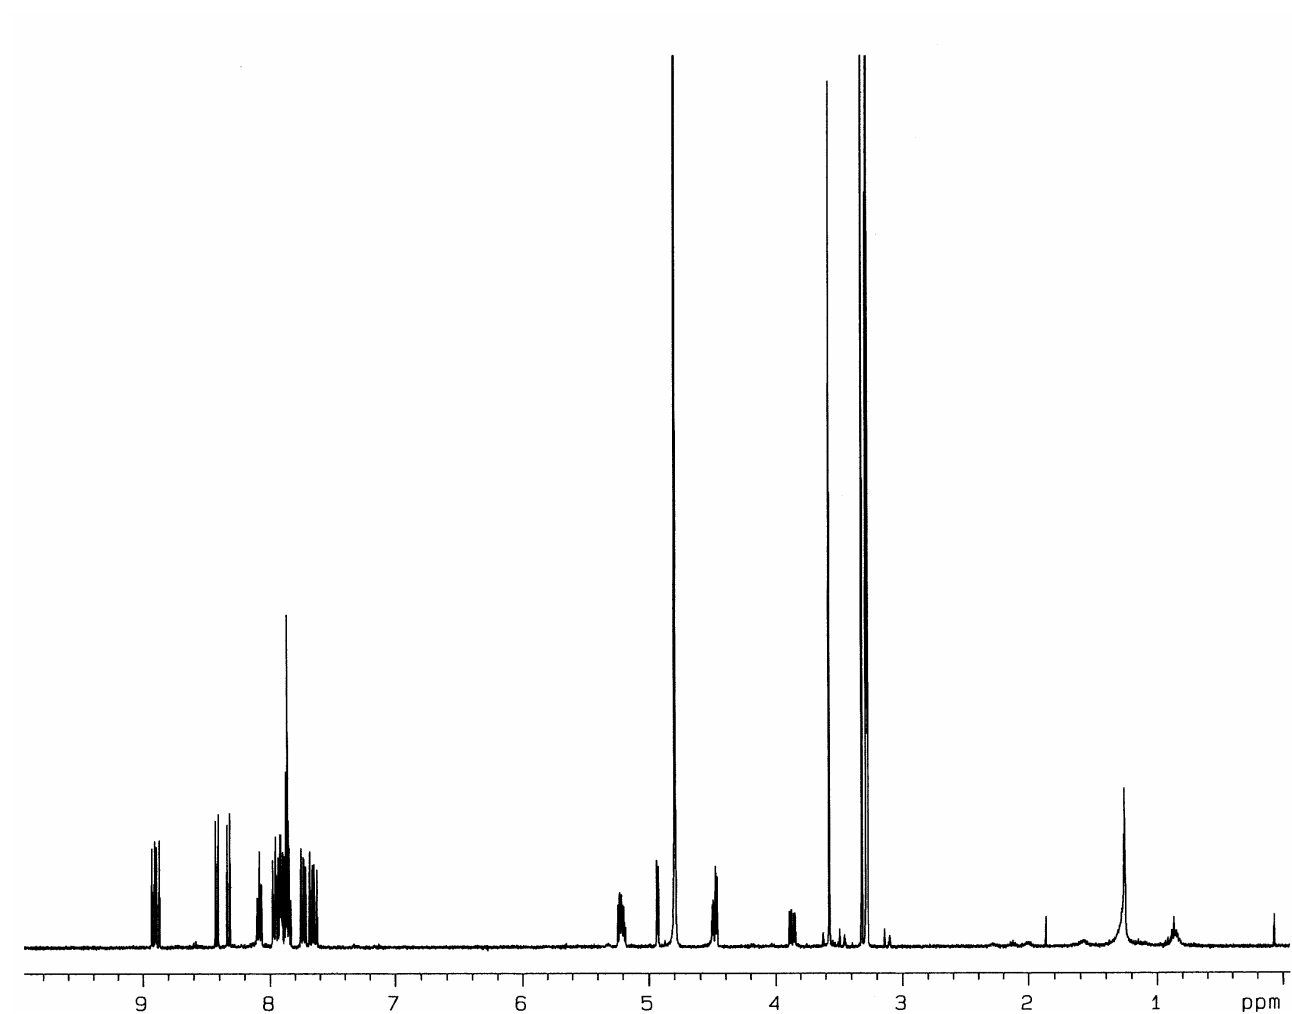

Figure S5.  $^1\text{H}$  NMR of **2** in  $\text{CD}_3\text{OD}$ .

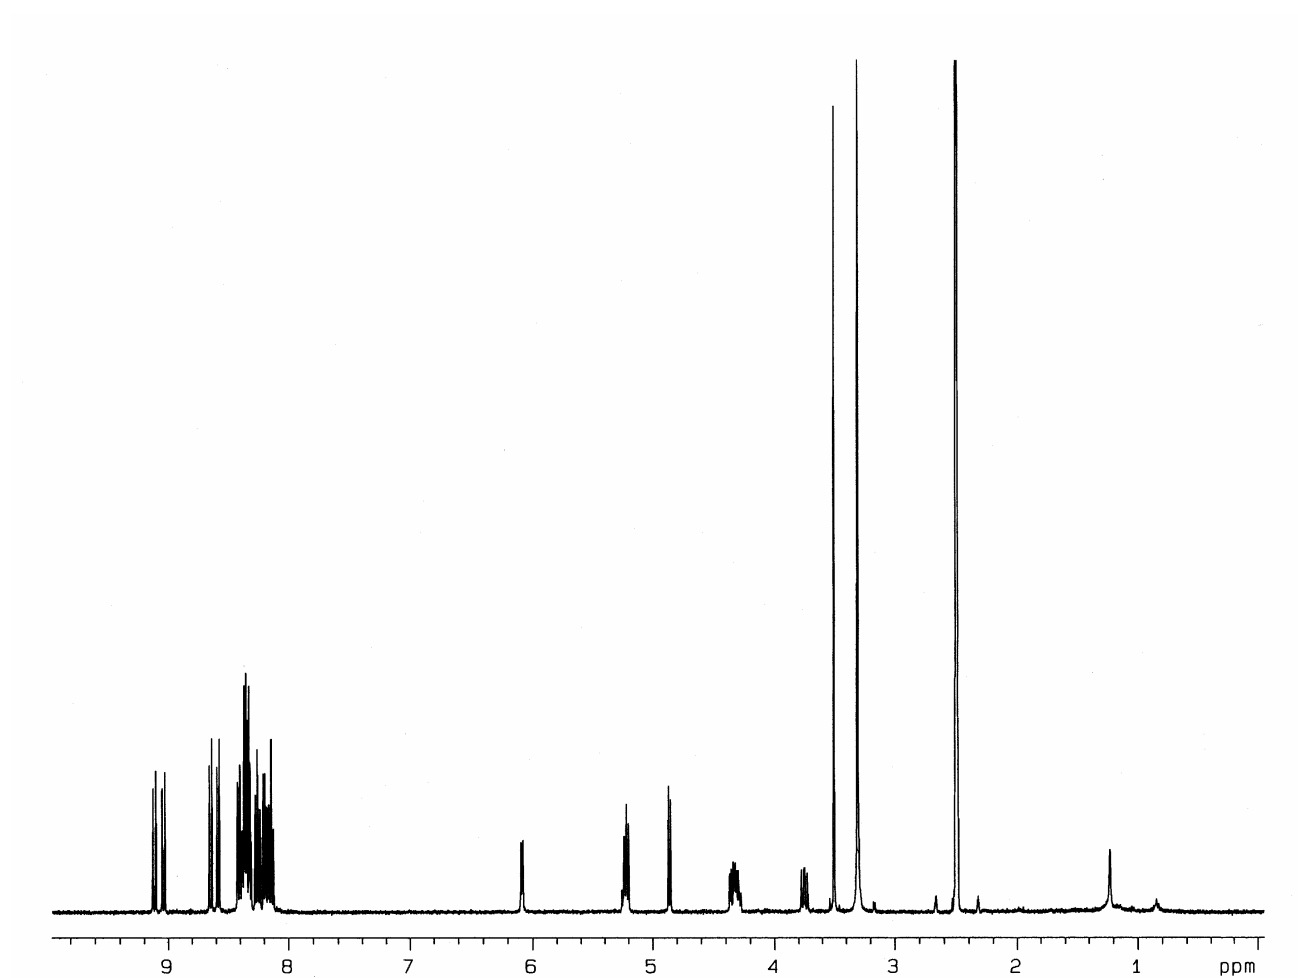

Figure S6.  $^1\text{H}$  NMR of **2** in DMSO.

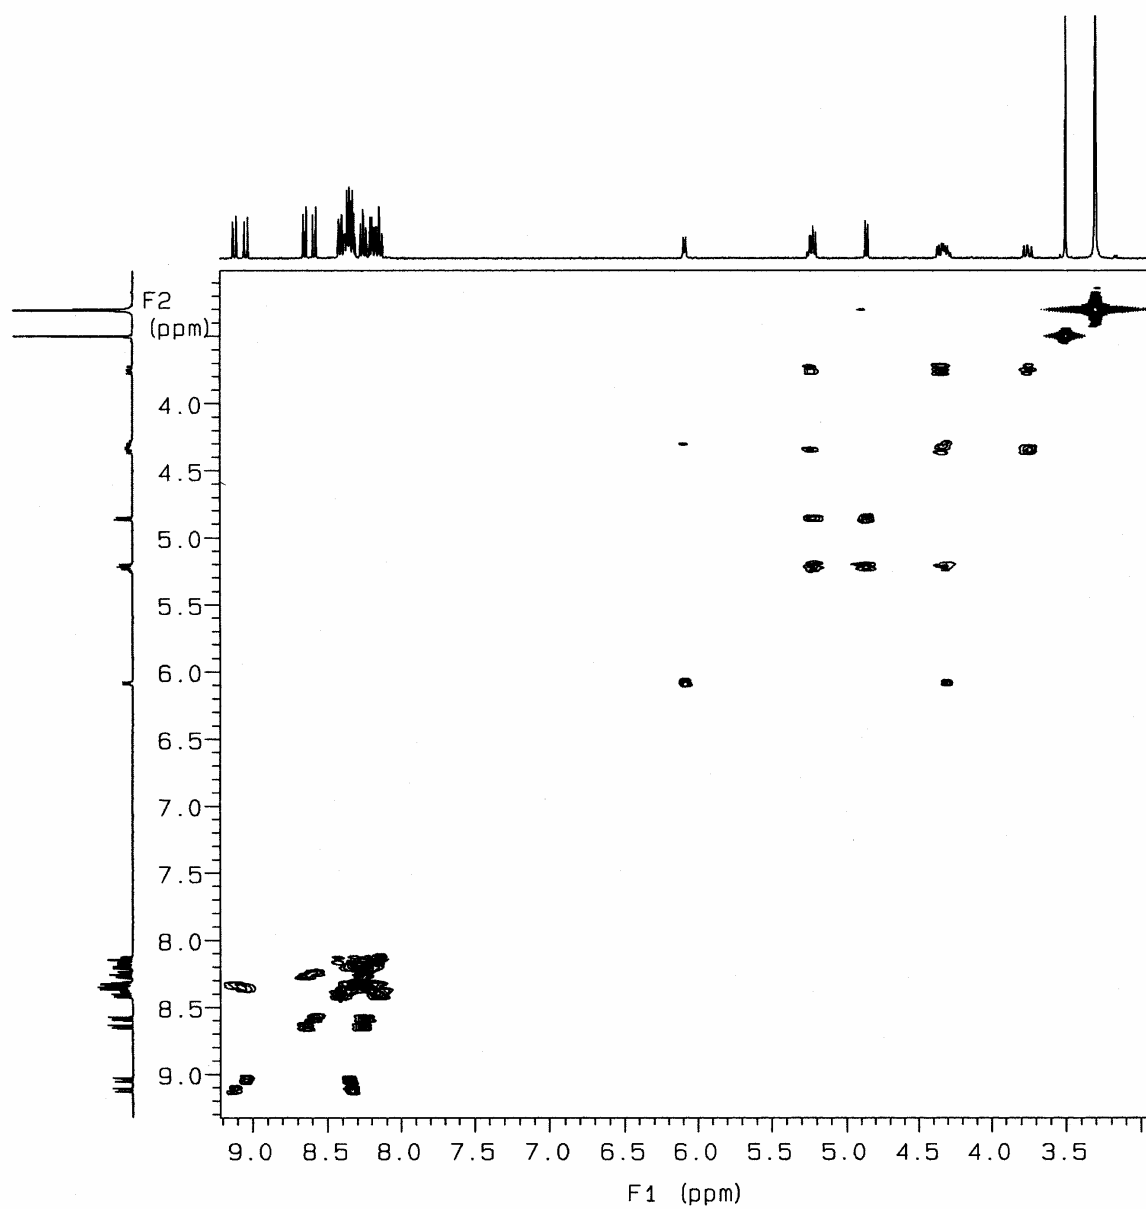

Figure S7. COSY spectrum of **2** in DMSO.

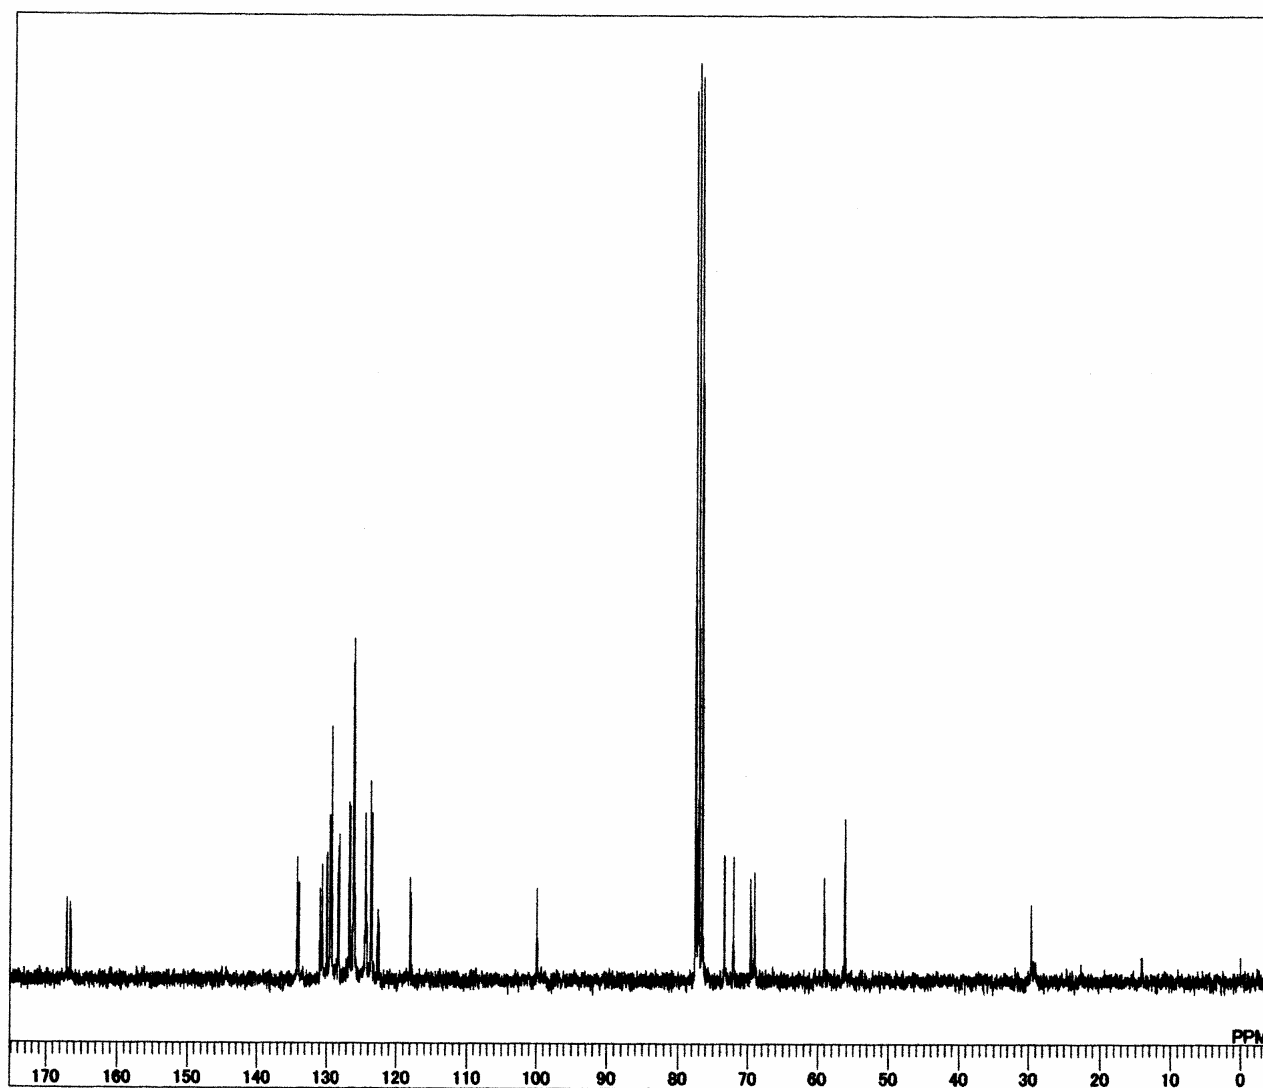

Figure S2.  $^{13}\text{C}$  NMR of **5**.

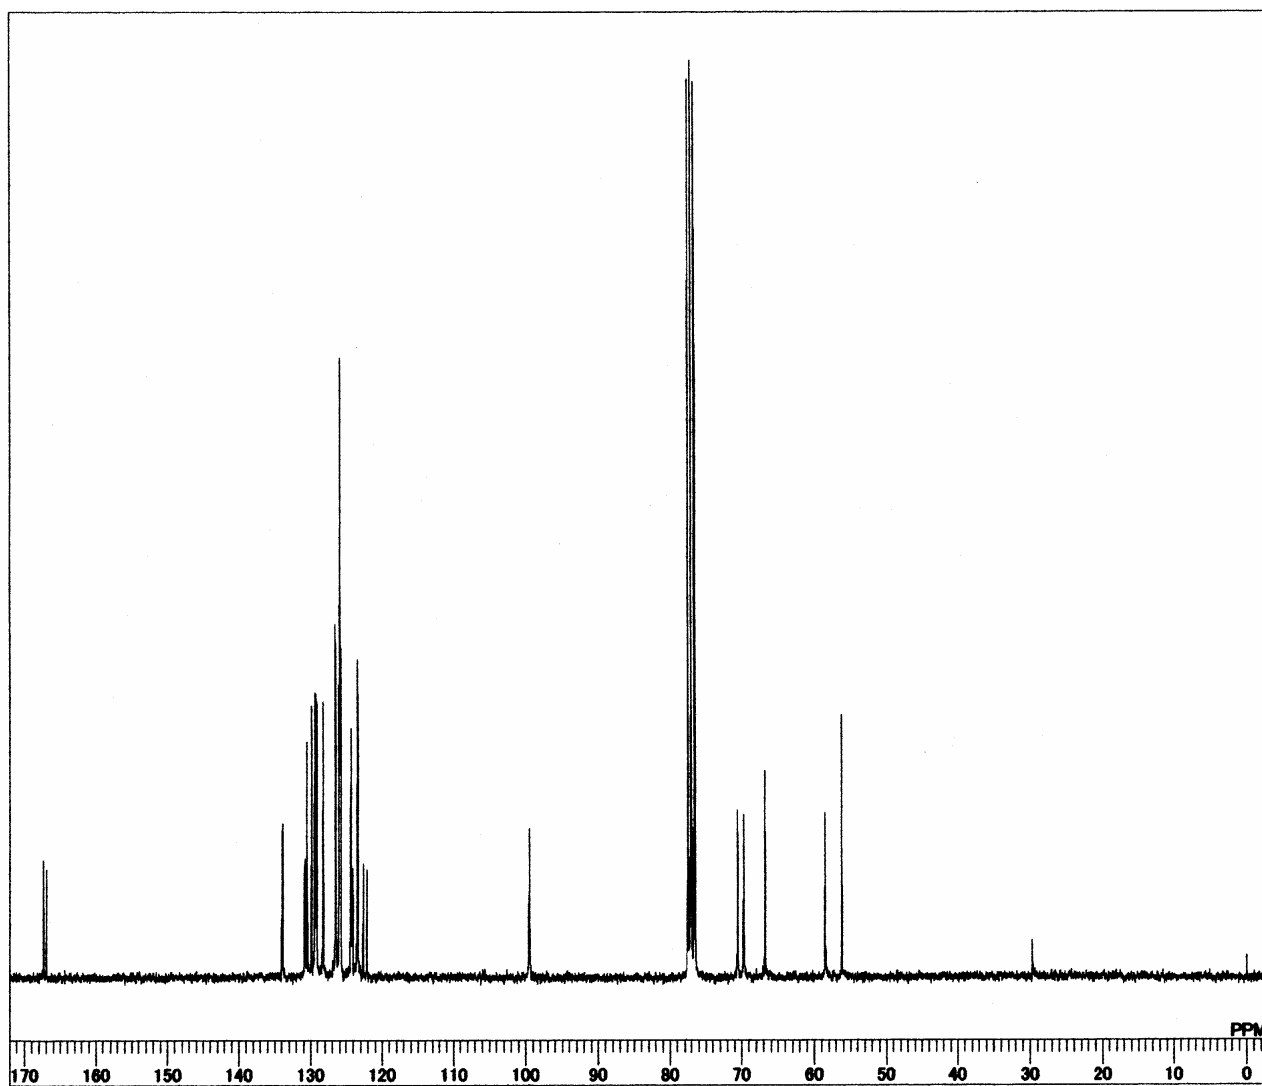

Figure S8.  $^{13}\text{C}$  NMR of **2**.

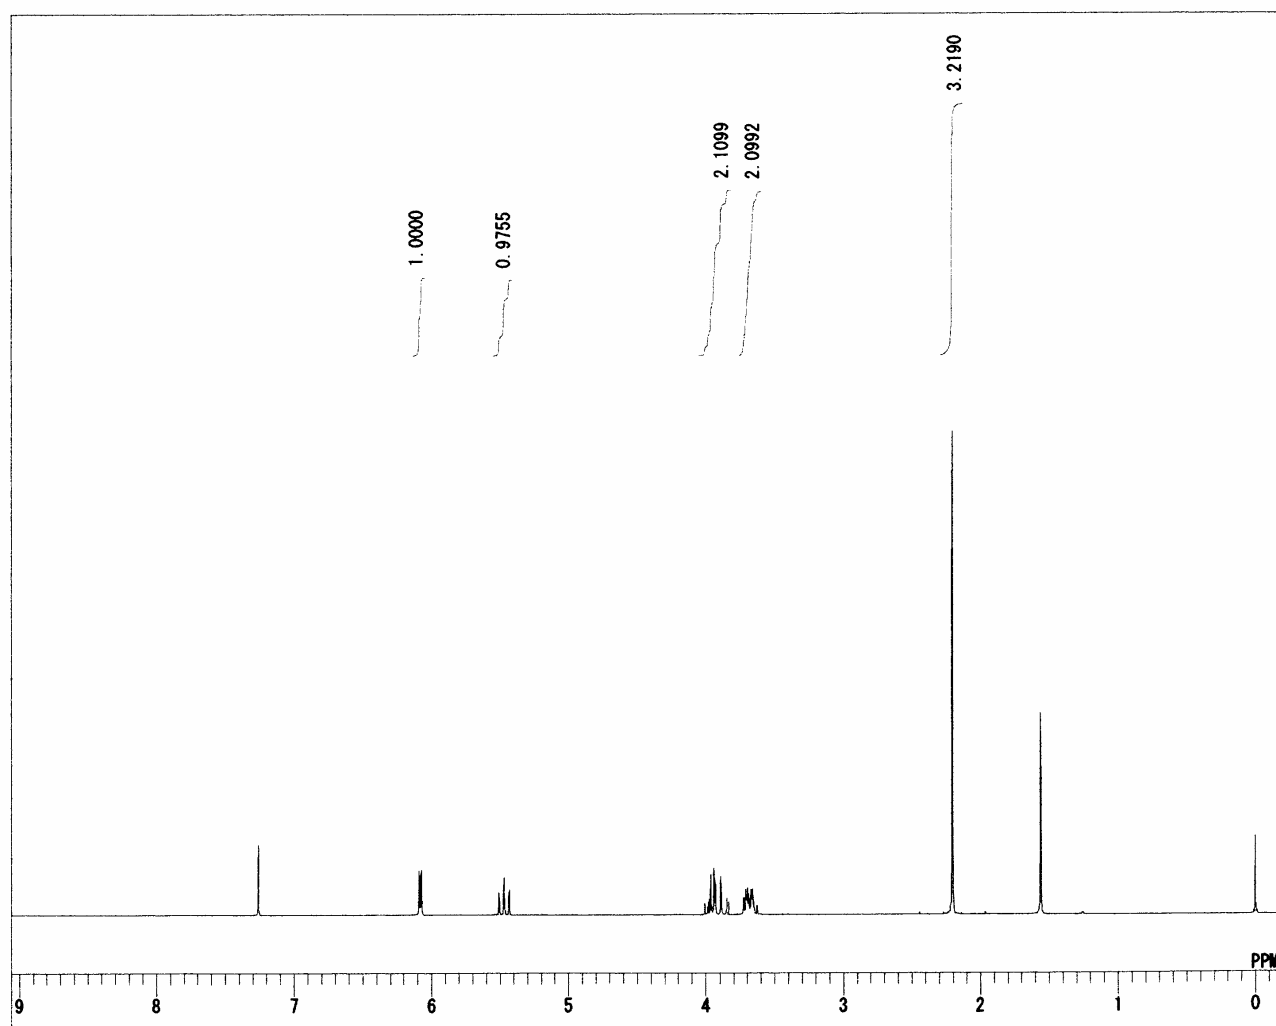

Figure S9.  $^1\text{H}$  NMR of **7** in  $\text{CDCl}_3$ .

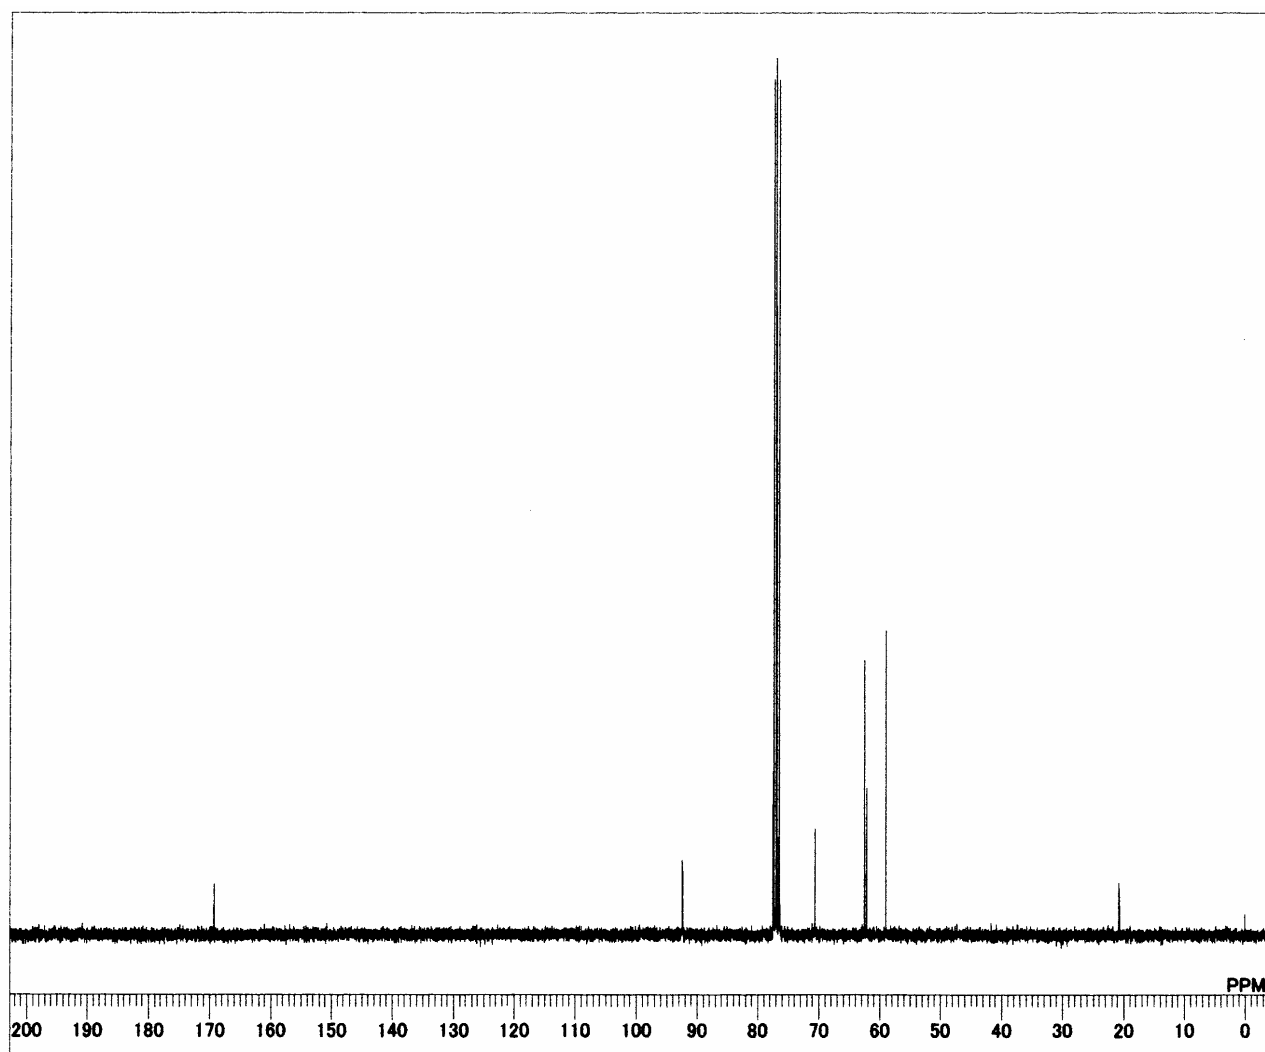

Figure S10.  $^{13}\text{C}$  NMR of **7** in  $\text{CDCl}_3$ .

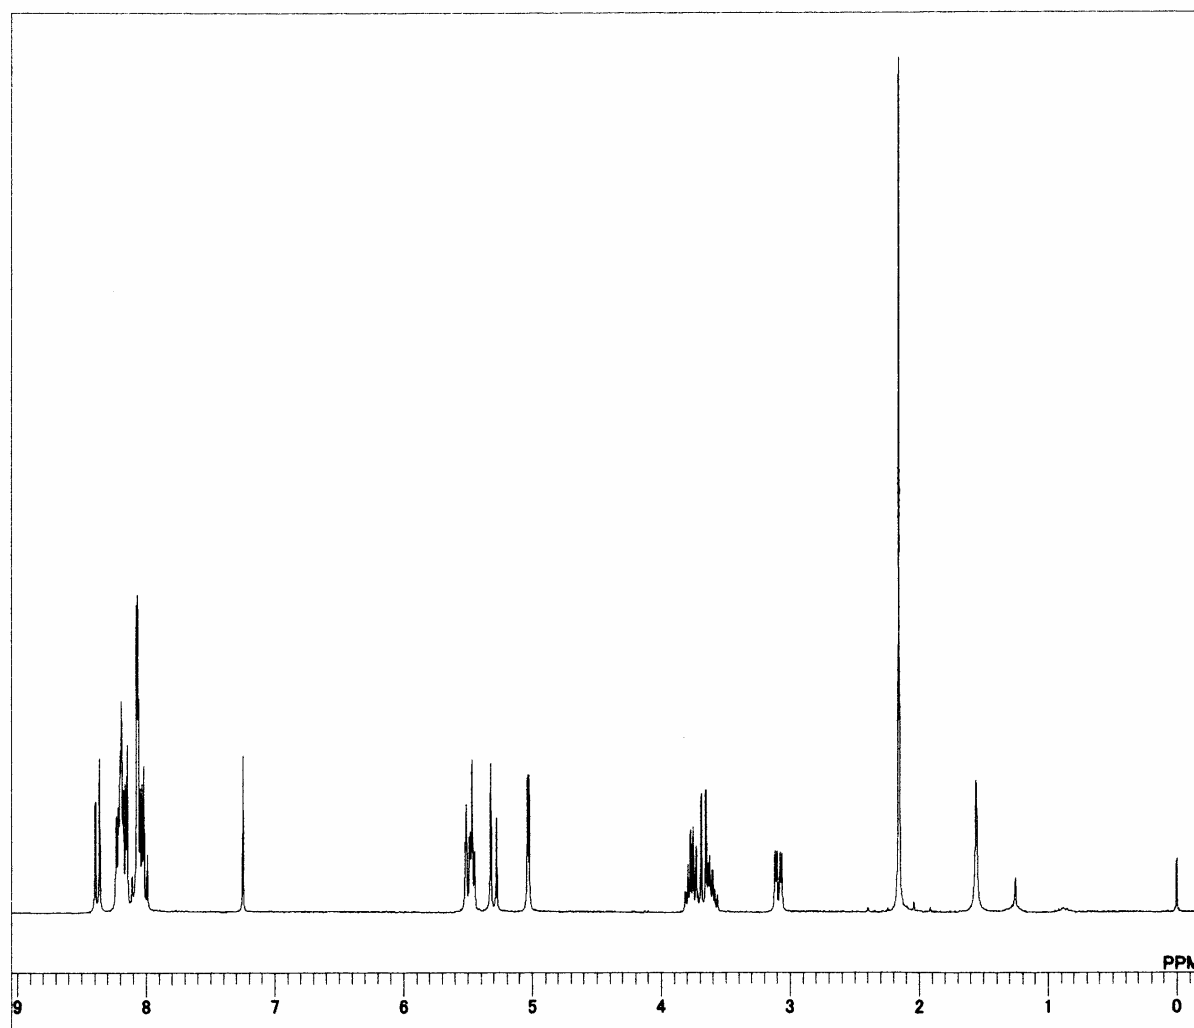

Figure S11.  $^1\text{H}$  NMR of **8a** in  $\text{CDCl}_3$ .

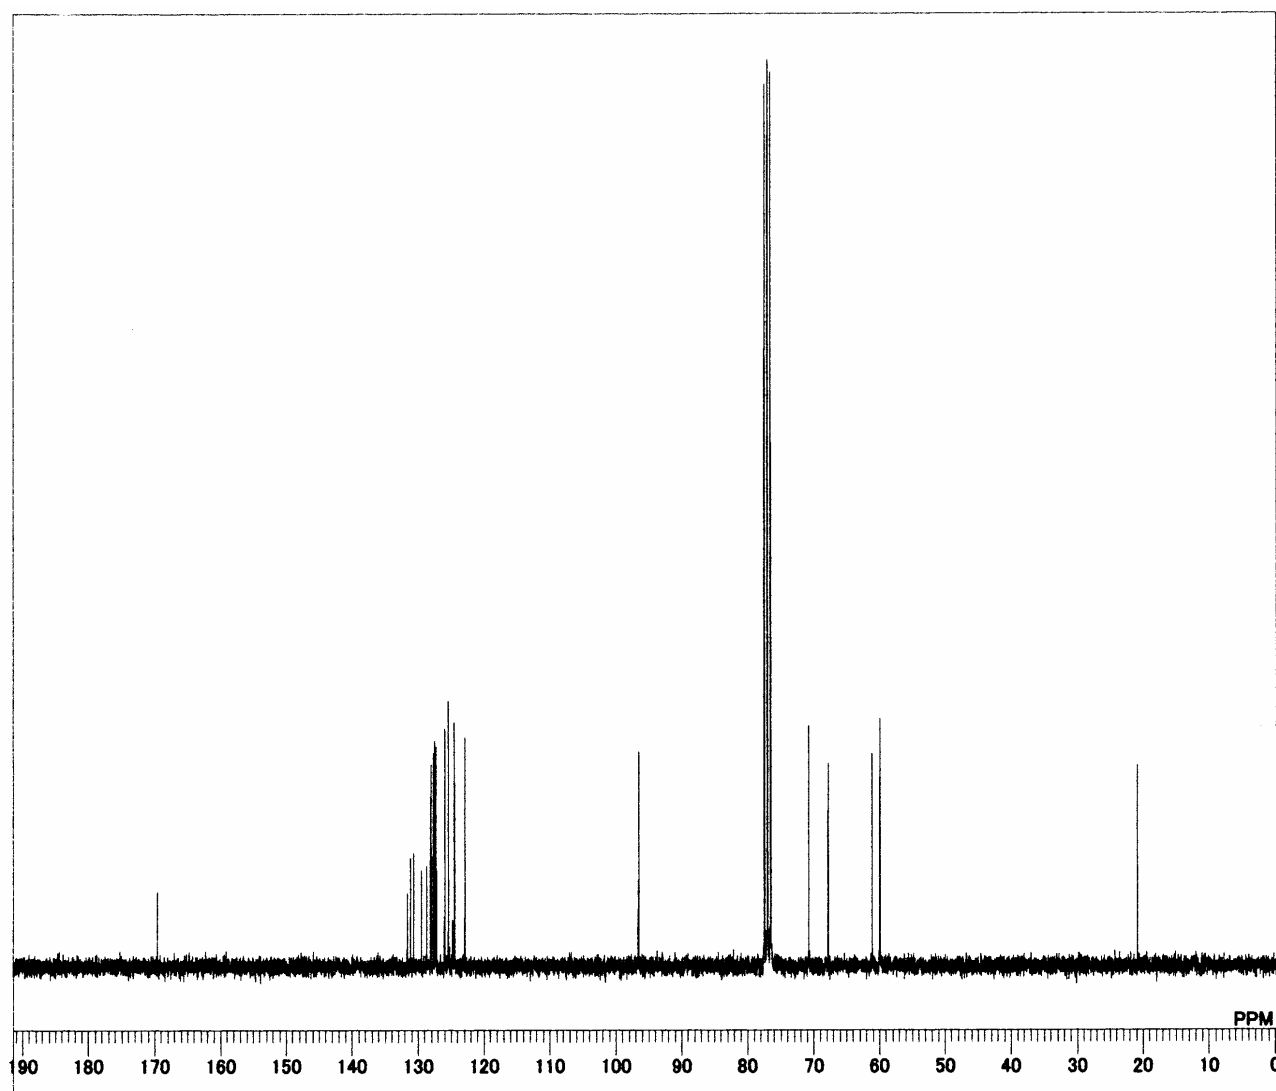

Figure S12.  $^{13}\text{C}$  NMR of **8α** in  $\text{CDCl}_3$ .

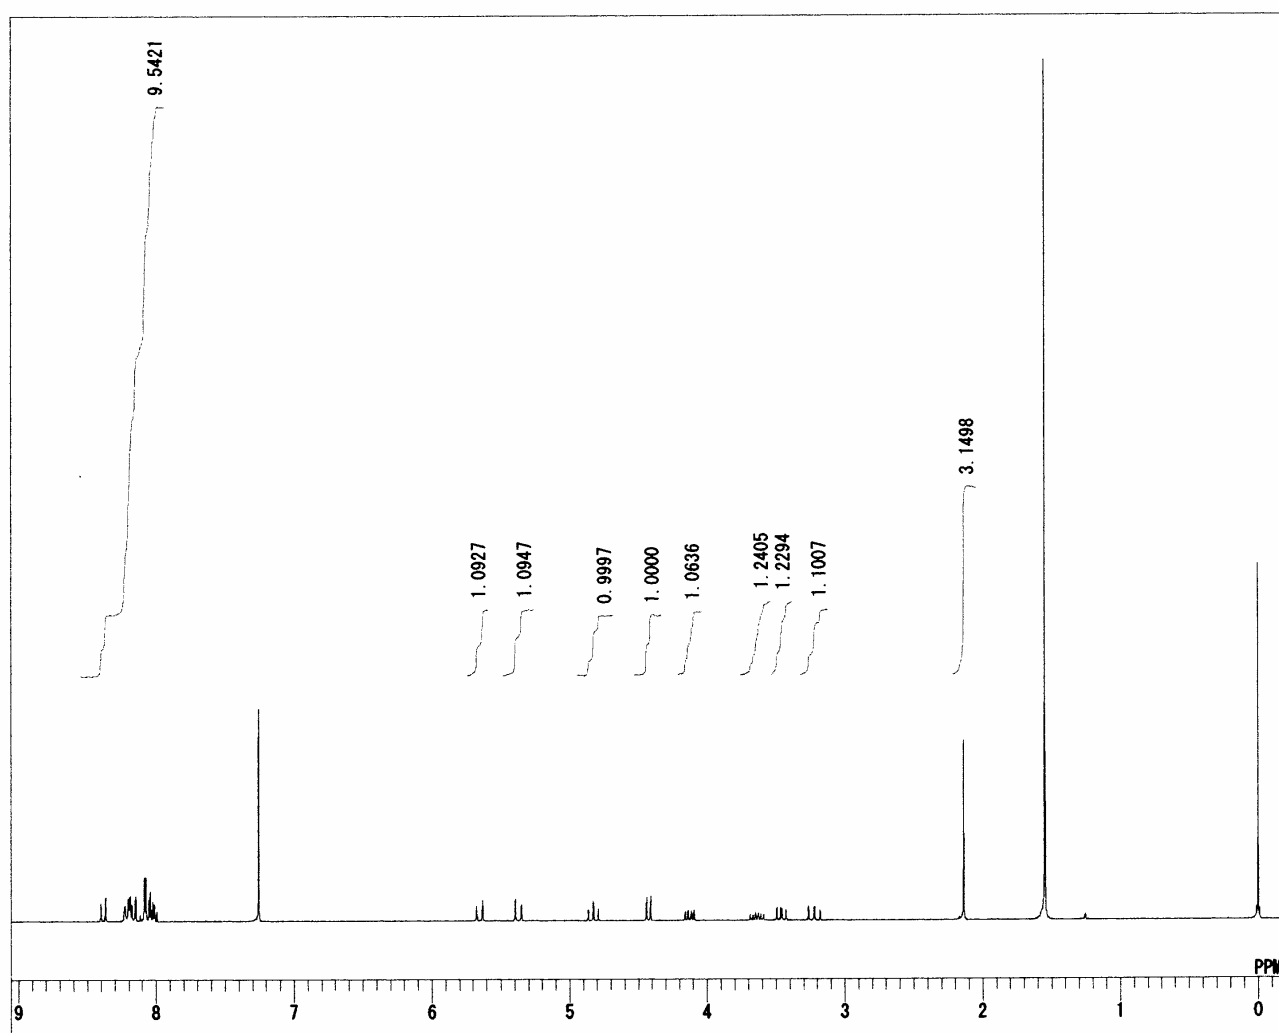

Figure S13. <sup>1</sup>H NMR of **8β** in CDCl<sub>3</sub>.

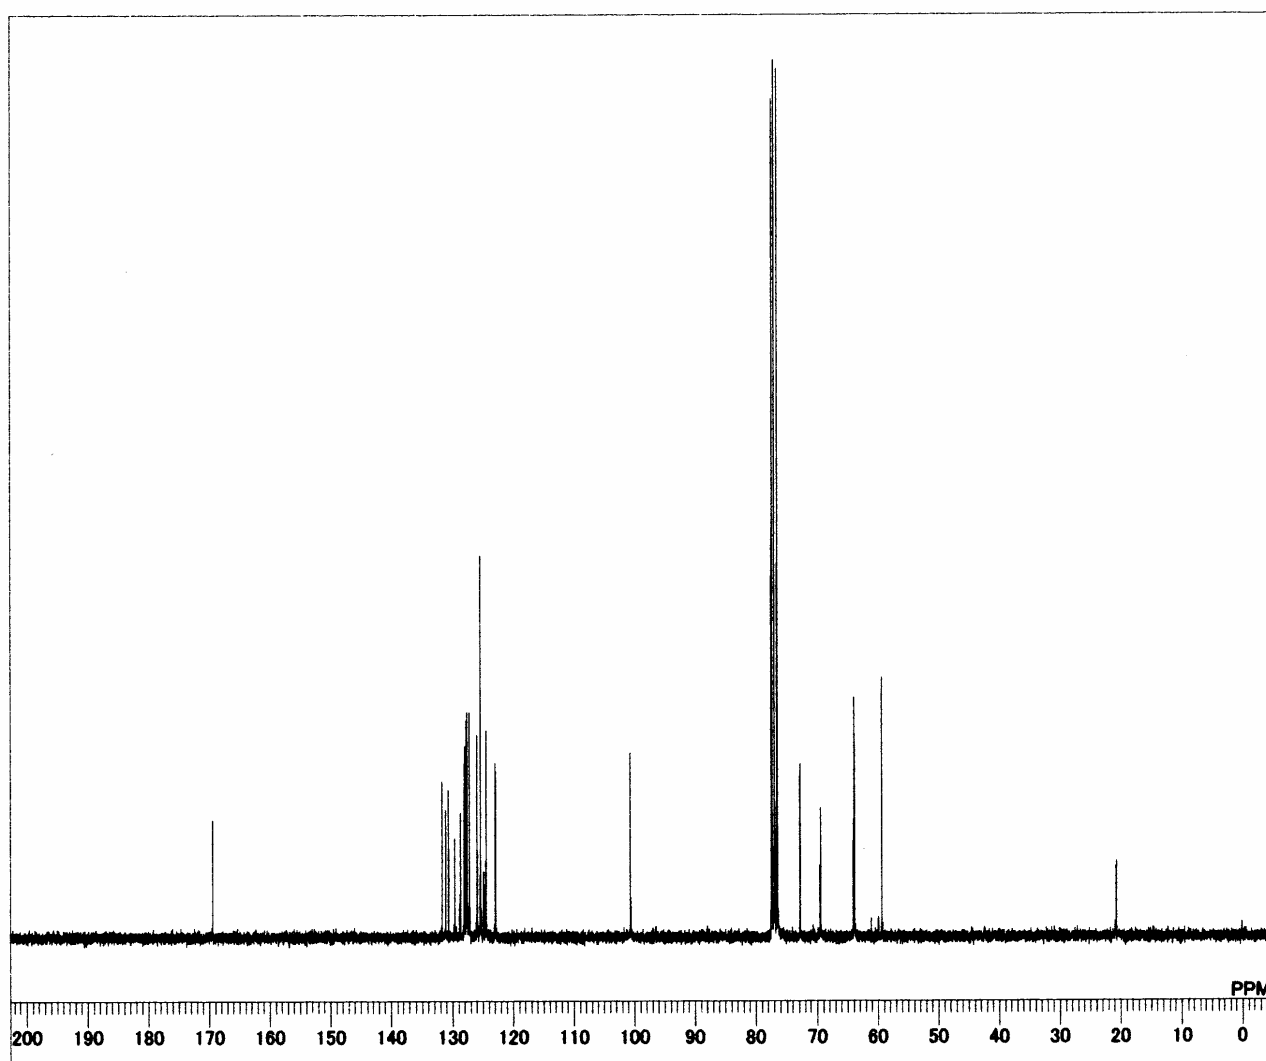

Figure S14.  $^{13}\text{C}$  NMR of **8** $\beta$  in  $\text{CDCl}_3$ .

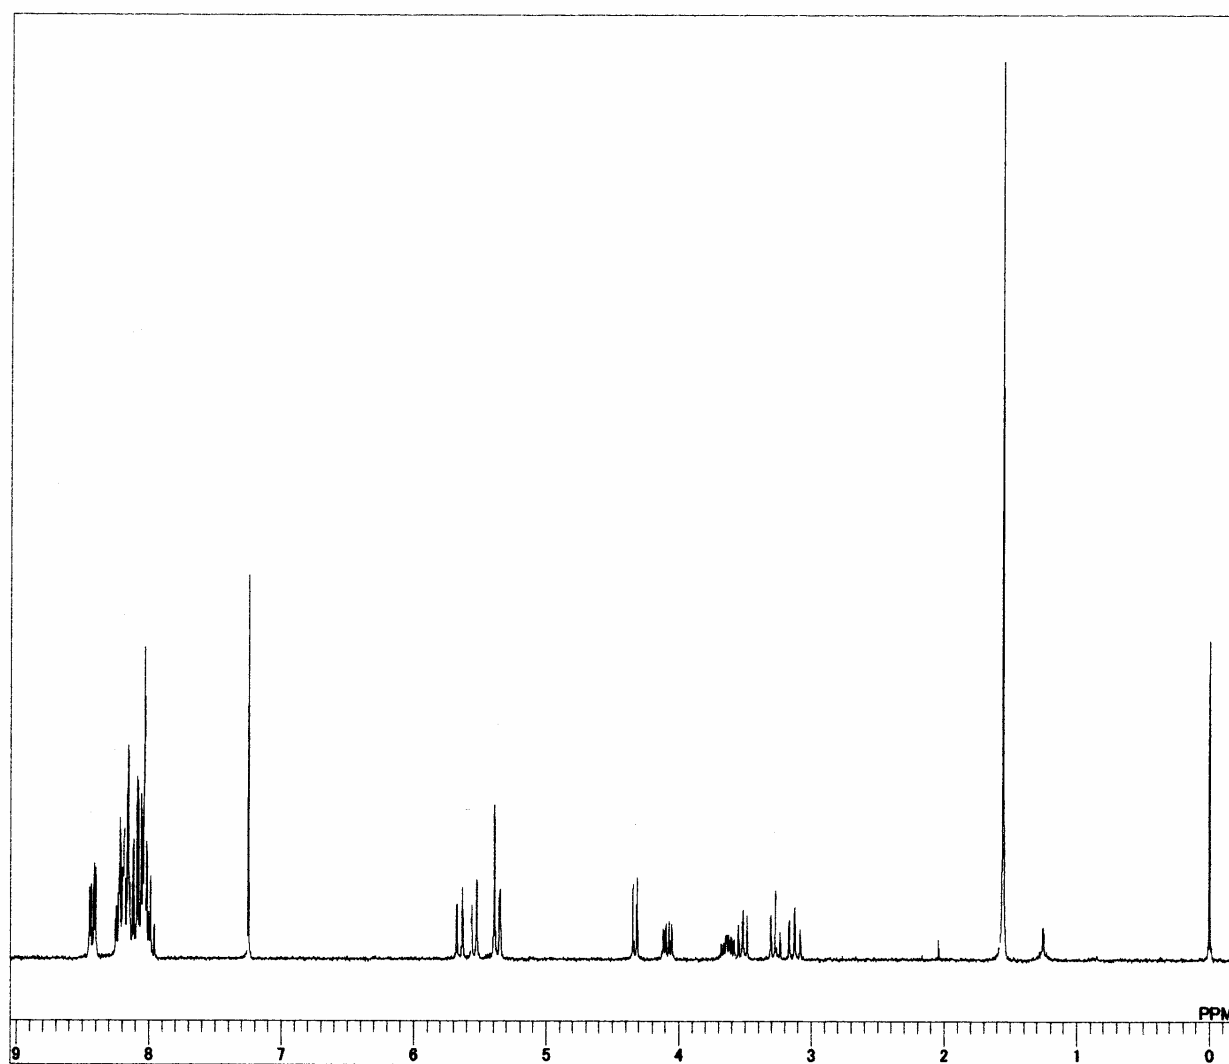

Figure S15.  $^1\text{H}$  NMR of **9** in  $\text{CDCl}_3$ .

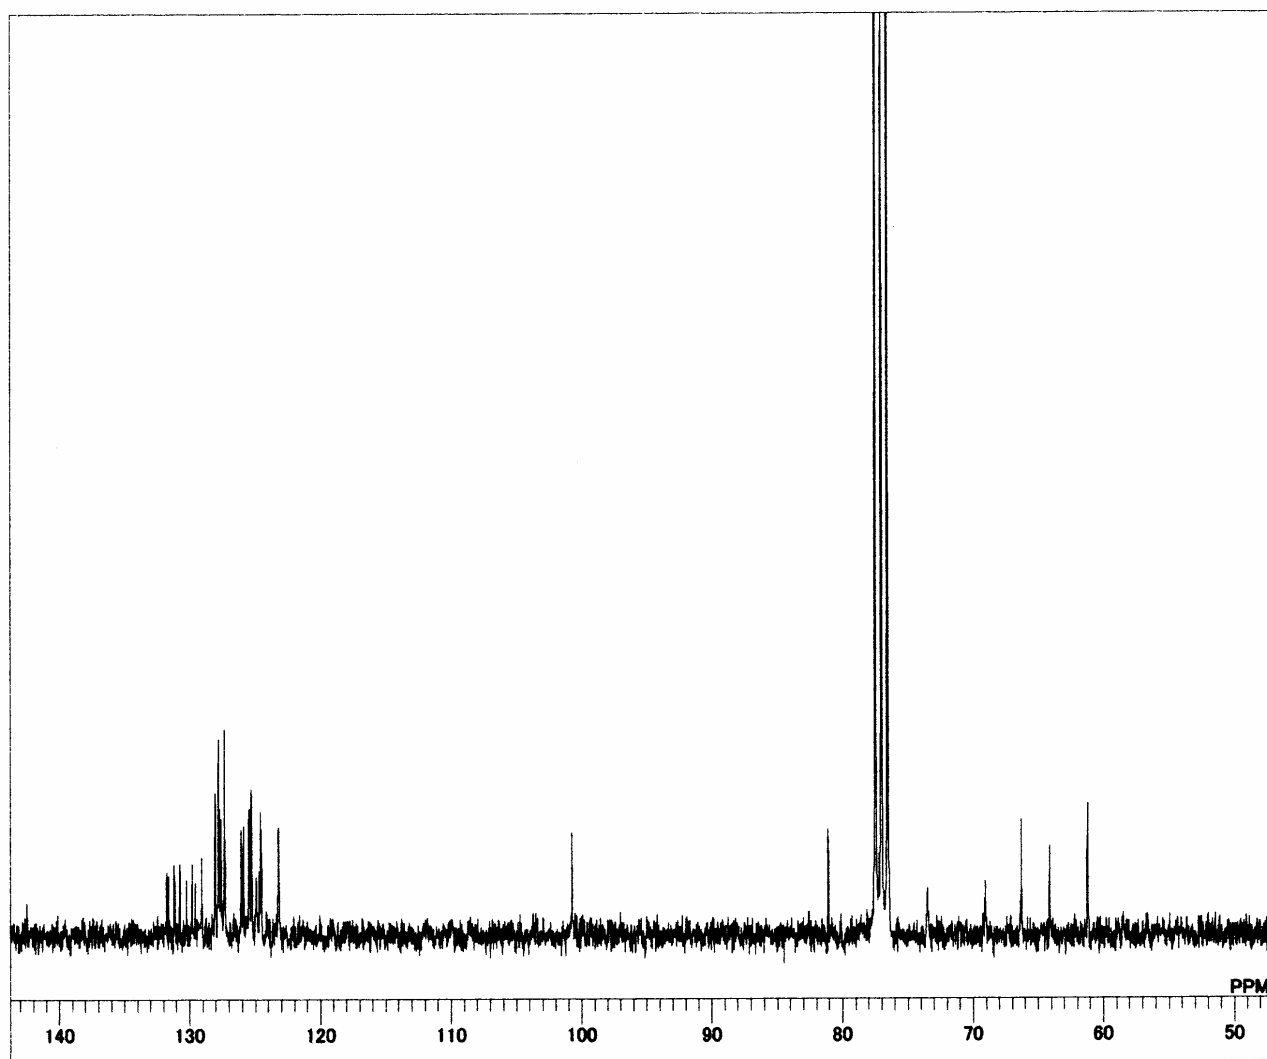

Figure S16.  $^{13}\text{C}$  NMR of **9** in  $\text{CDCl}_3$ .

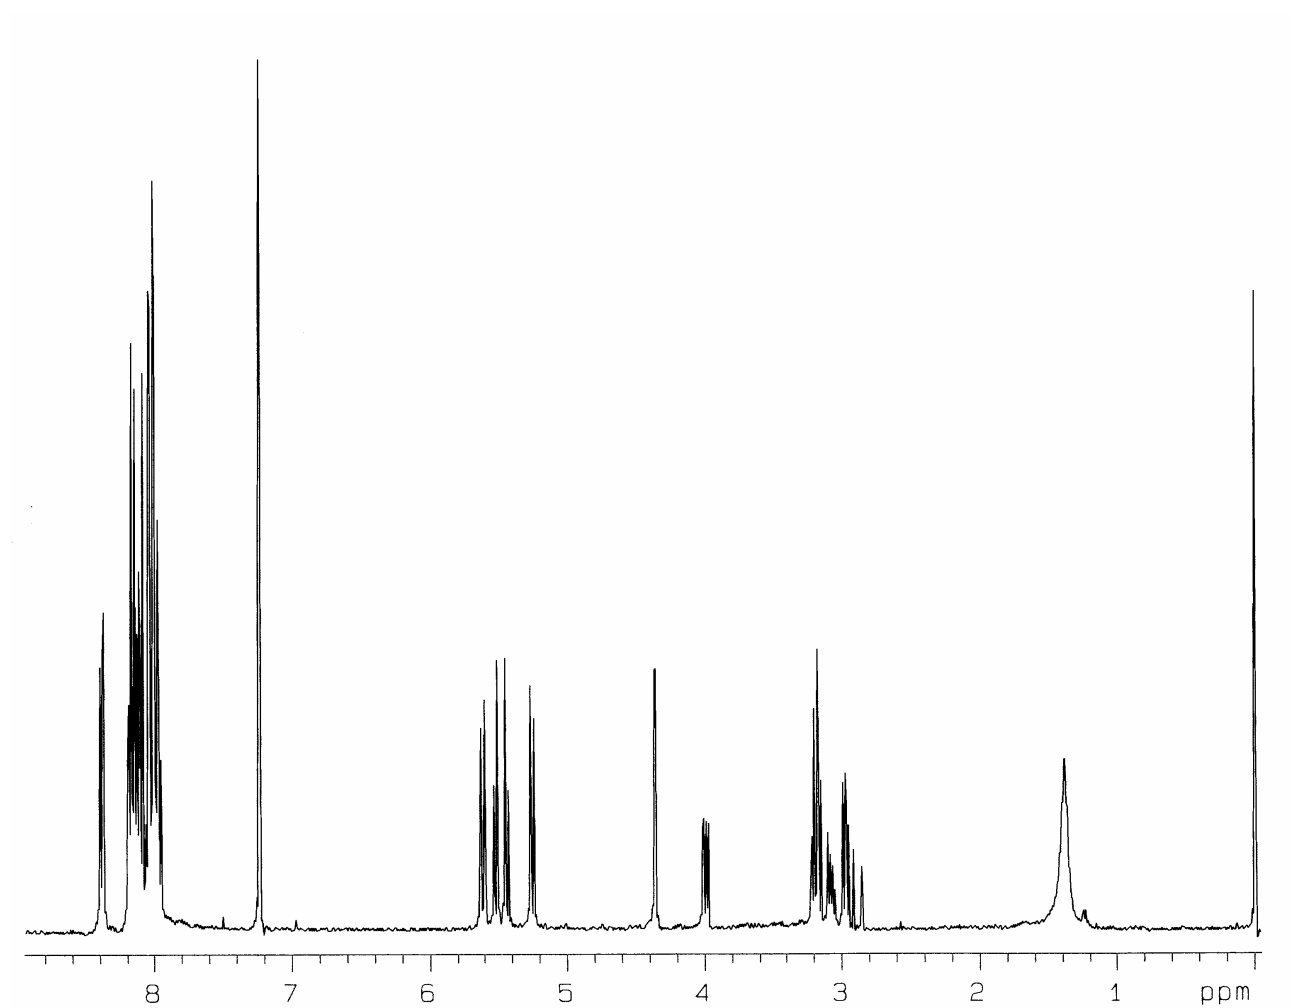

Figure S17.  $^1\text{H}$  NMR of **1** in  $\text{CDCl}_3$ .

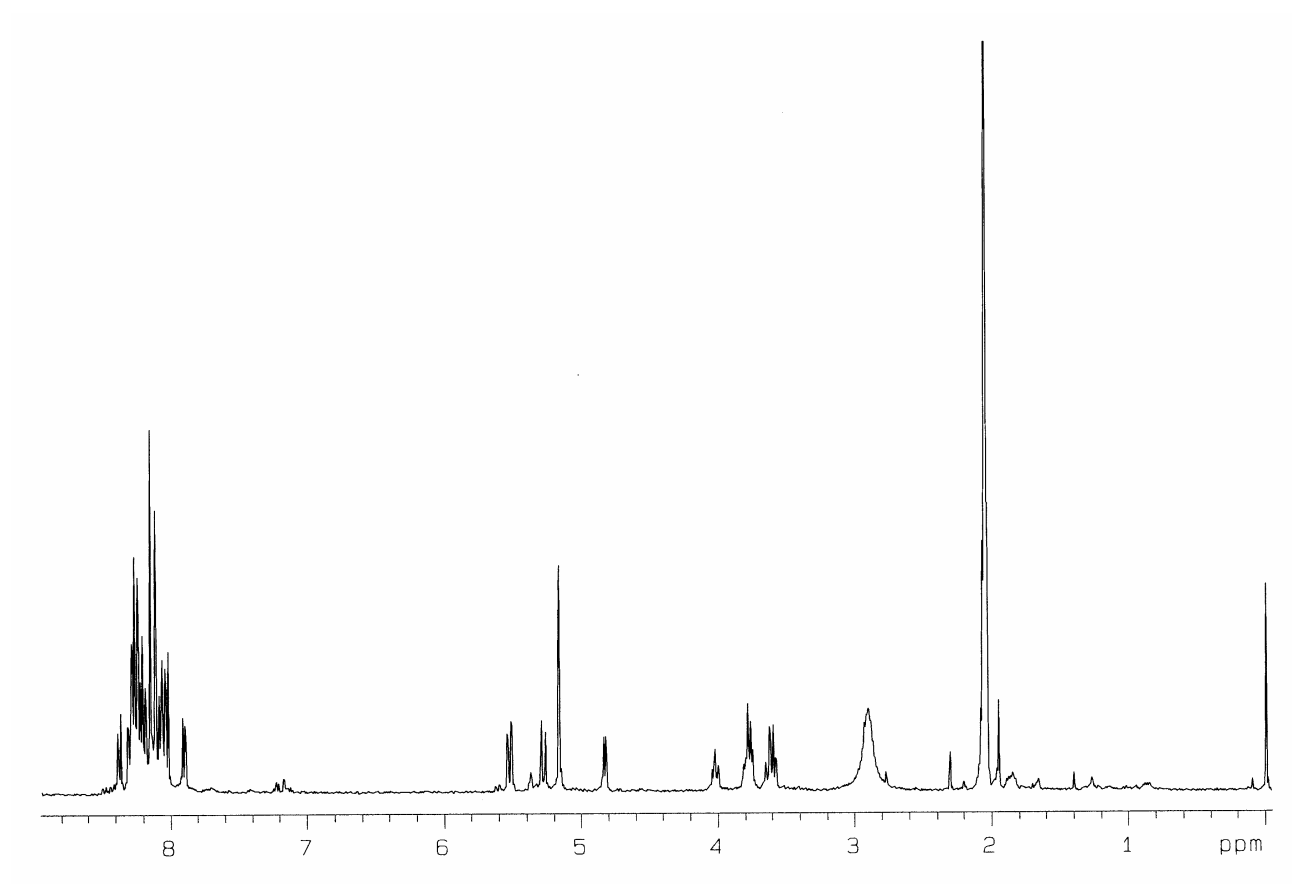

Figure S18.  $^1\text{H}$  NMR of **1** in acetone- $\text{d}_6$ .

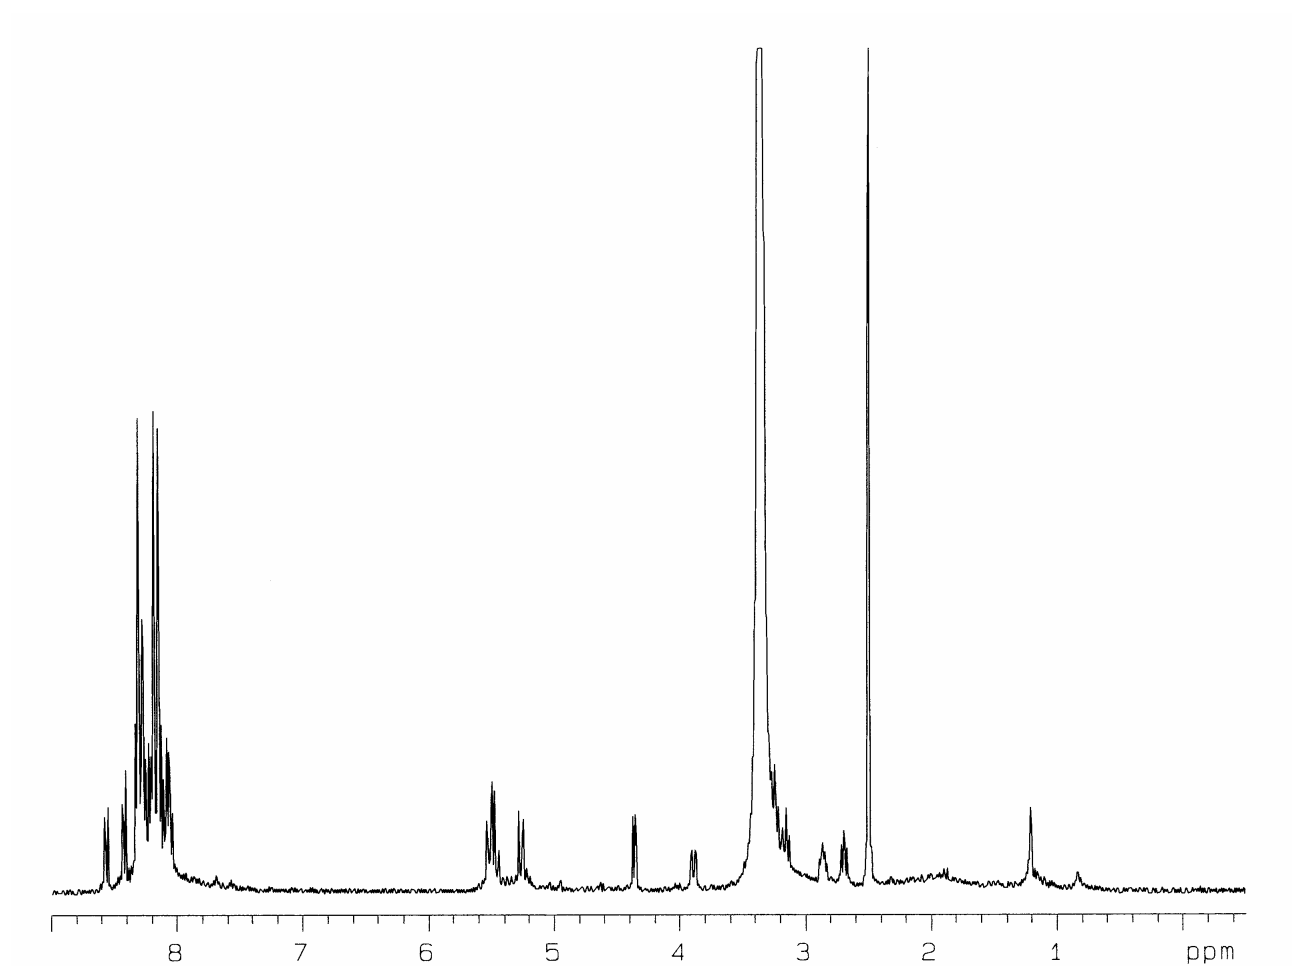

Figure S19.  $^1\text{H}$  NMR of **1** in  $\text{DMSO-d}_6$ .

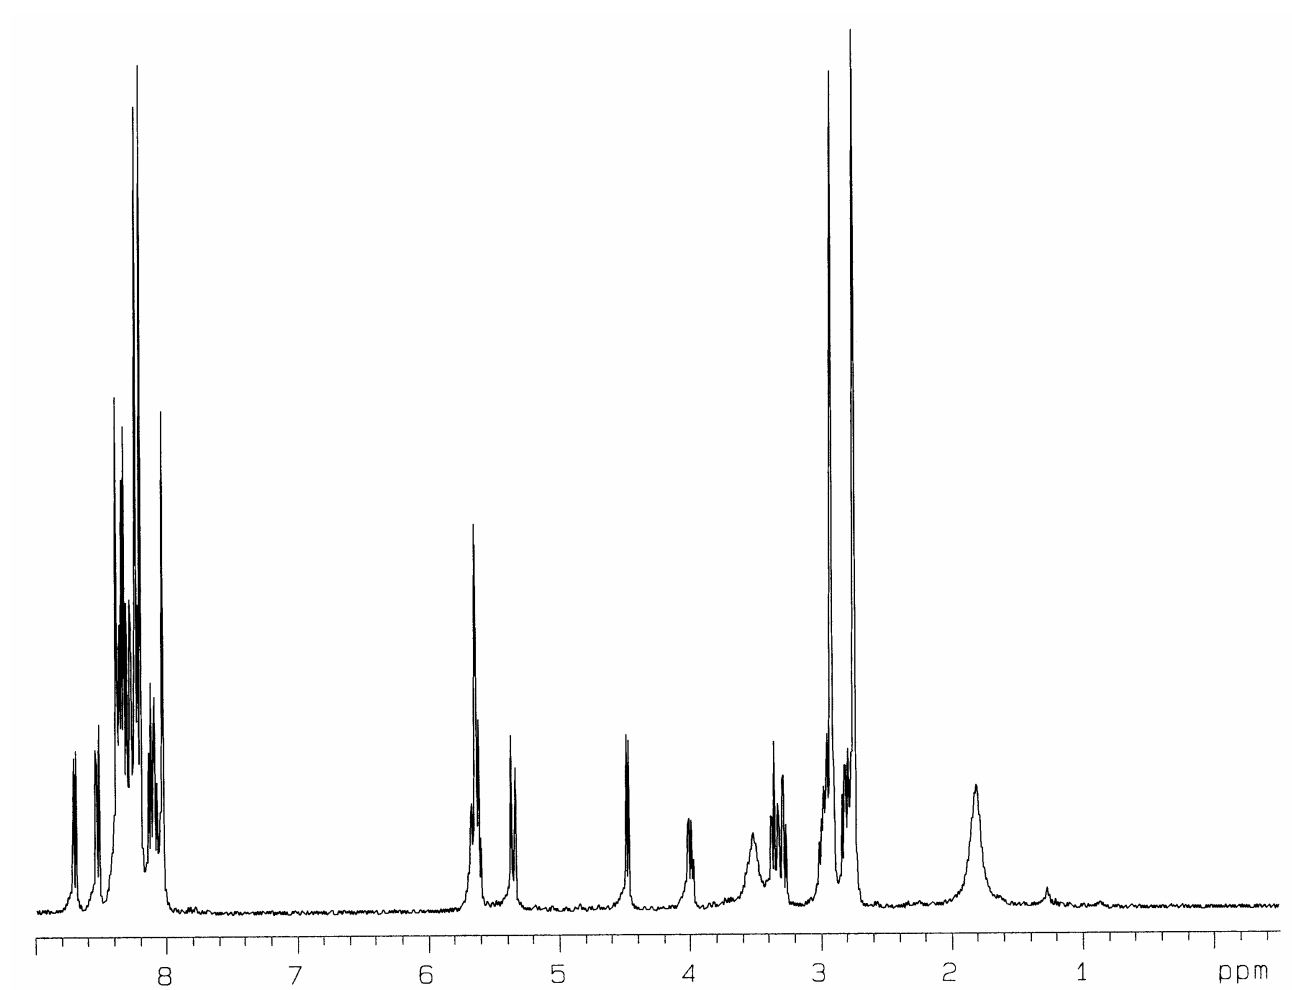

Figure S20.  $^1\text{H}$  NMR of **1** in  $\text{DMF-d}_7$ .

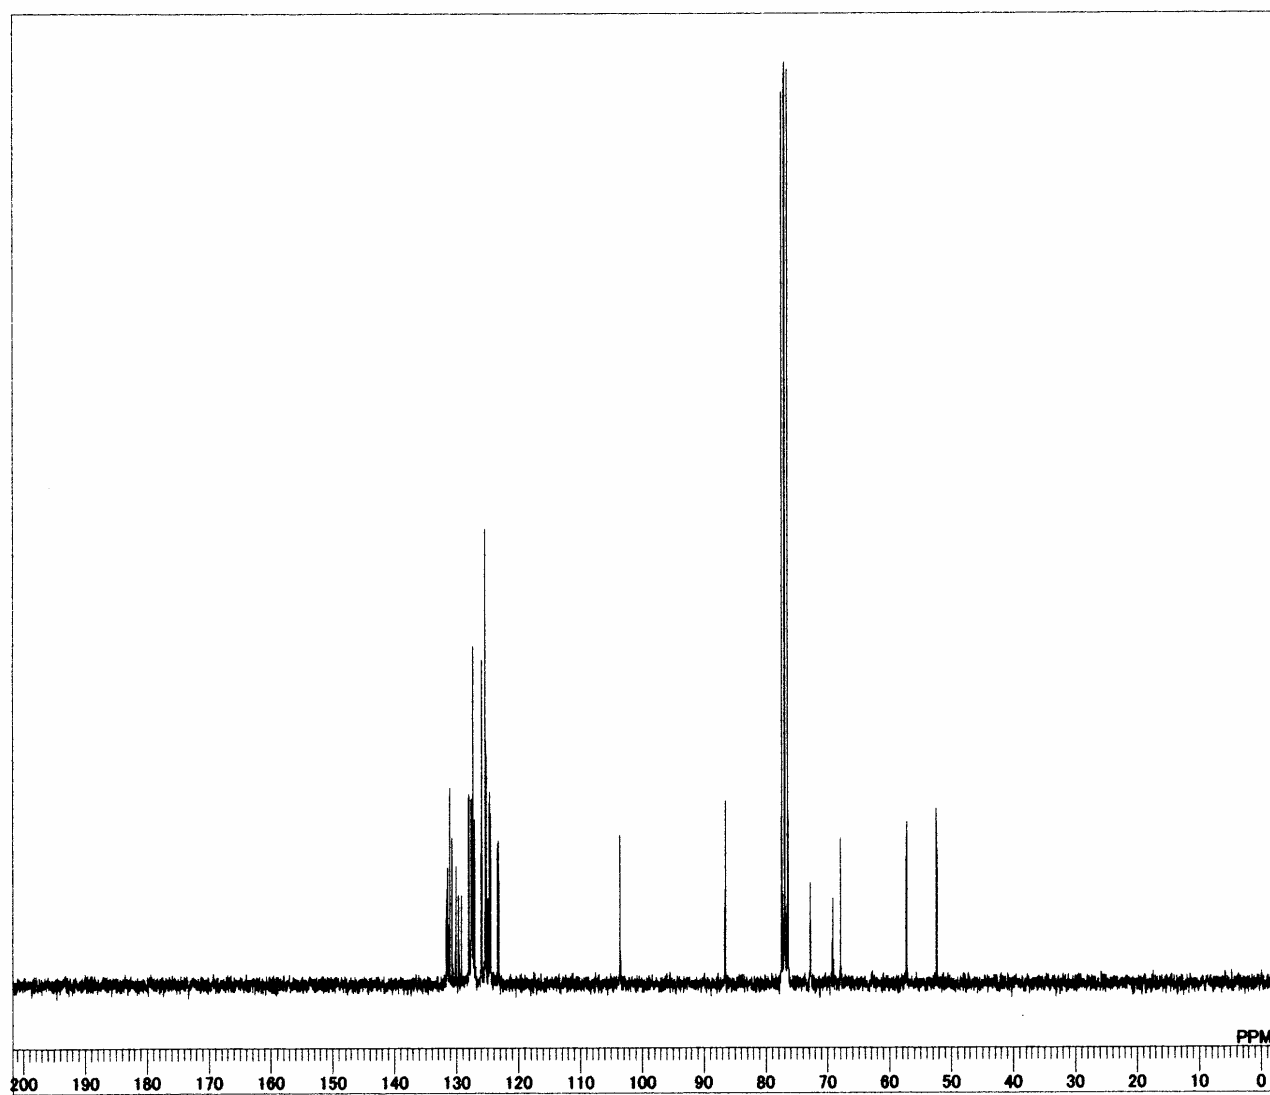

Figure S21.  $^{13}\text{C}$  NMR of **1** in  $\text{CDCl}_3$ .

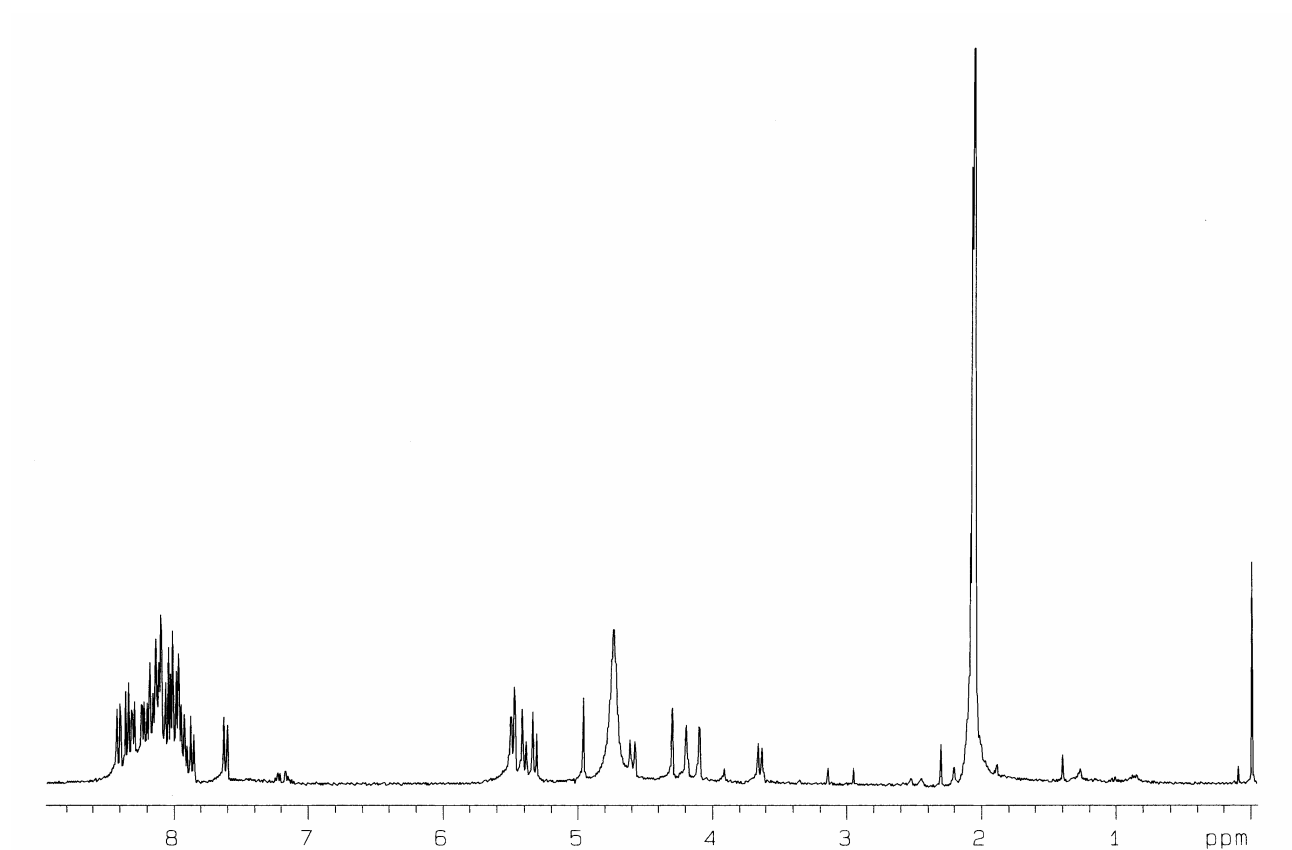

Figure S22.  $^1\text{H}$  NMR of **1** with  $\text{ZnCl}_2$  in acetone- $\text{d}_6$ .

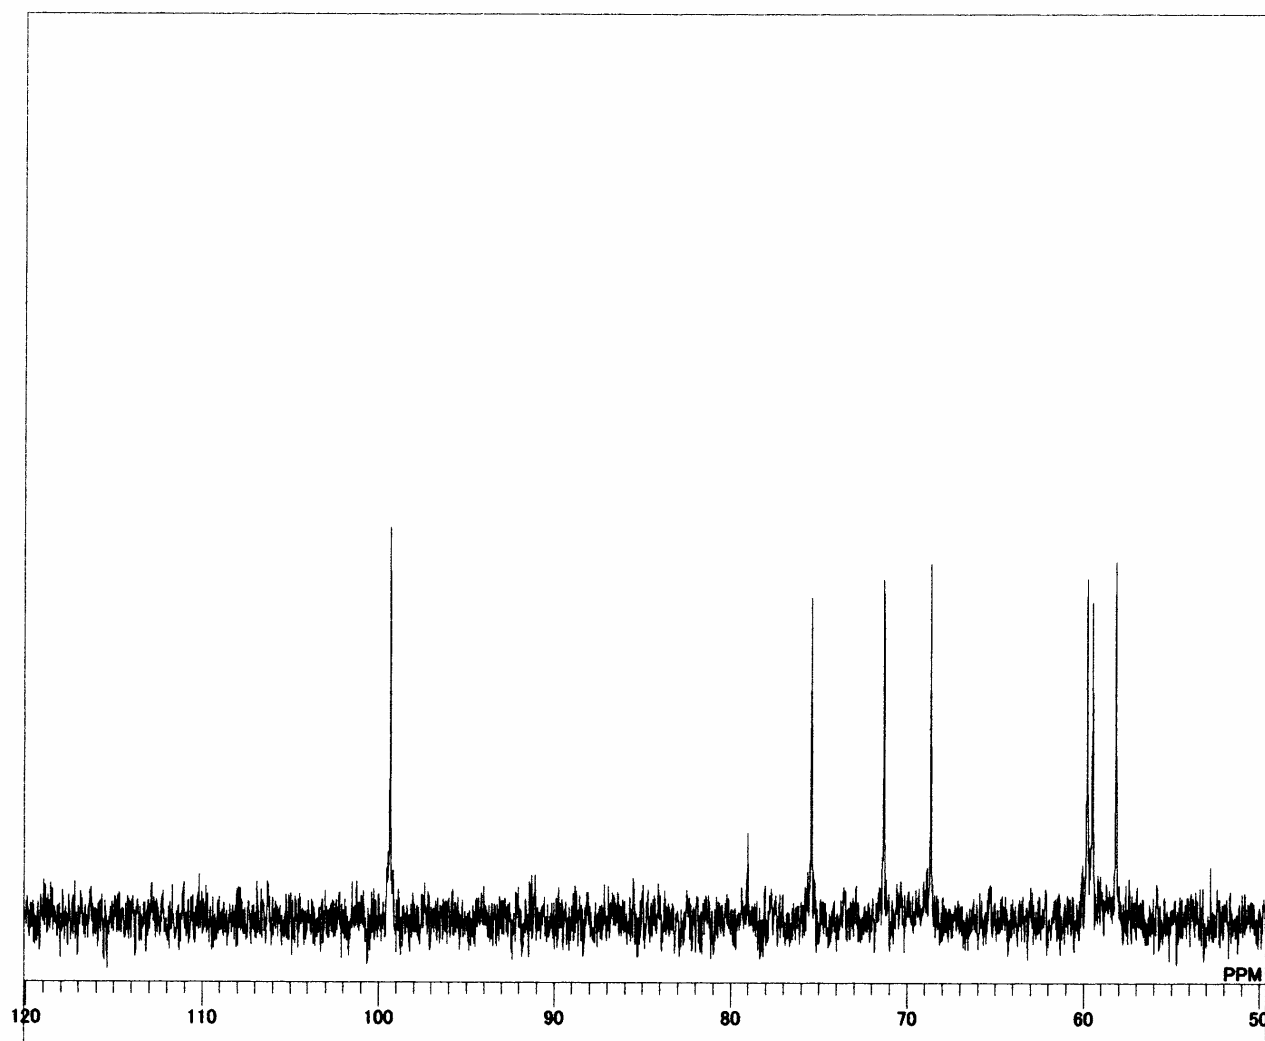

Figure S23.  $^{13}\text{C}$  NMR of **1** with  $\text{ZnCl}_2$  in acetone- $\text{d}_6$ .

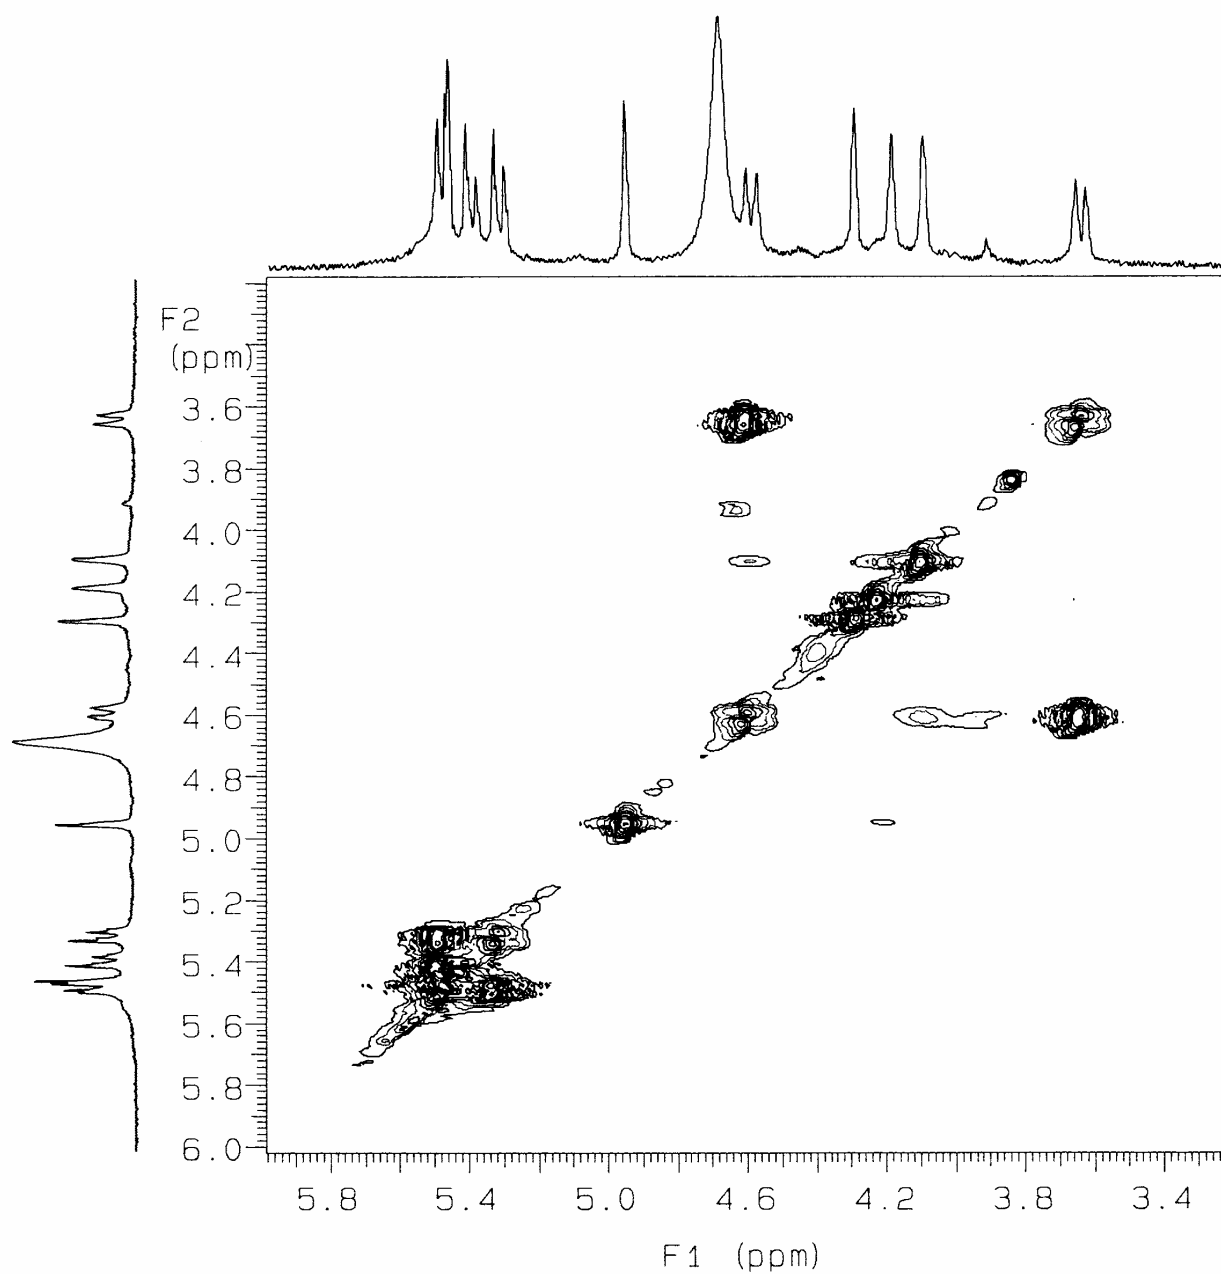

Figure S24. COSY spectrum of **1** with ZnCl<sub>2</sub> in acetone-d<sub>6</sub>.

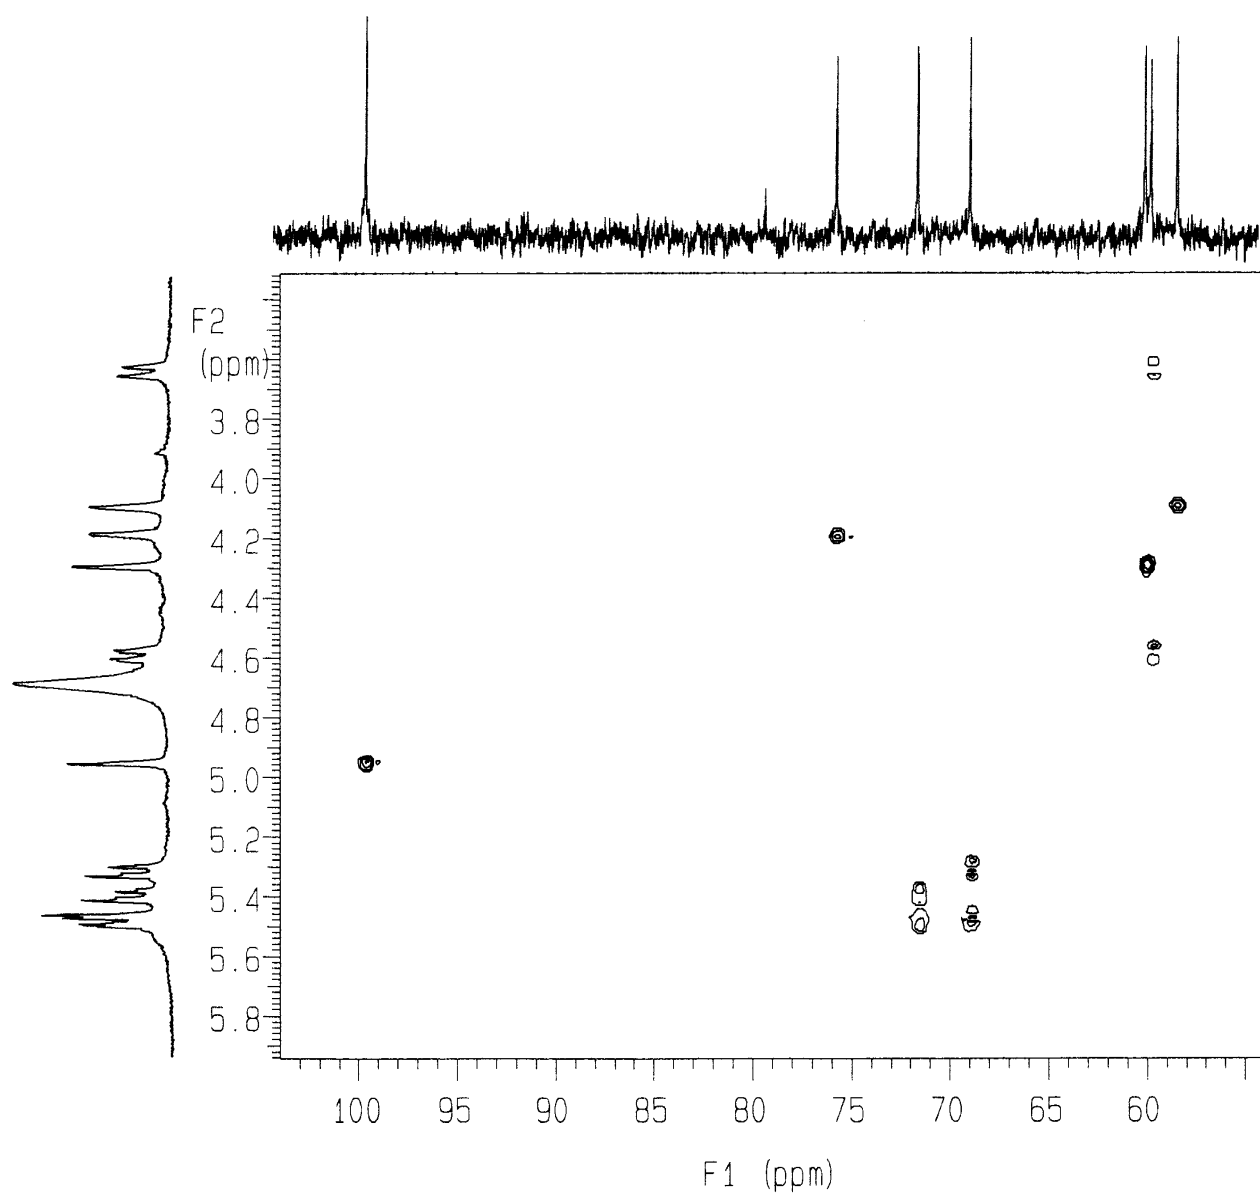

Figure S25. HMQC spectrum of **1** with  $\text{ZnCl}_2$  in acetone- $\text{d}_6$ .

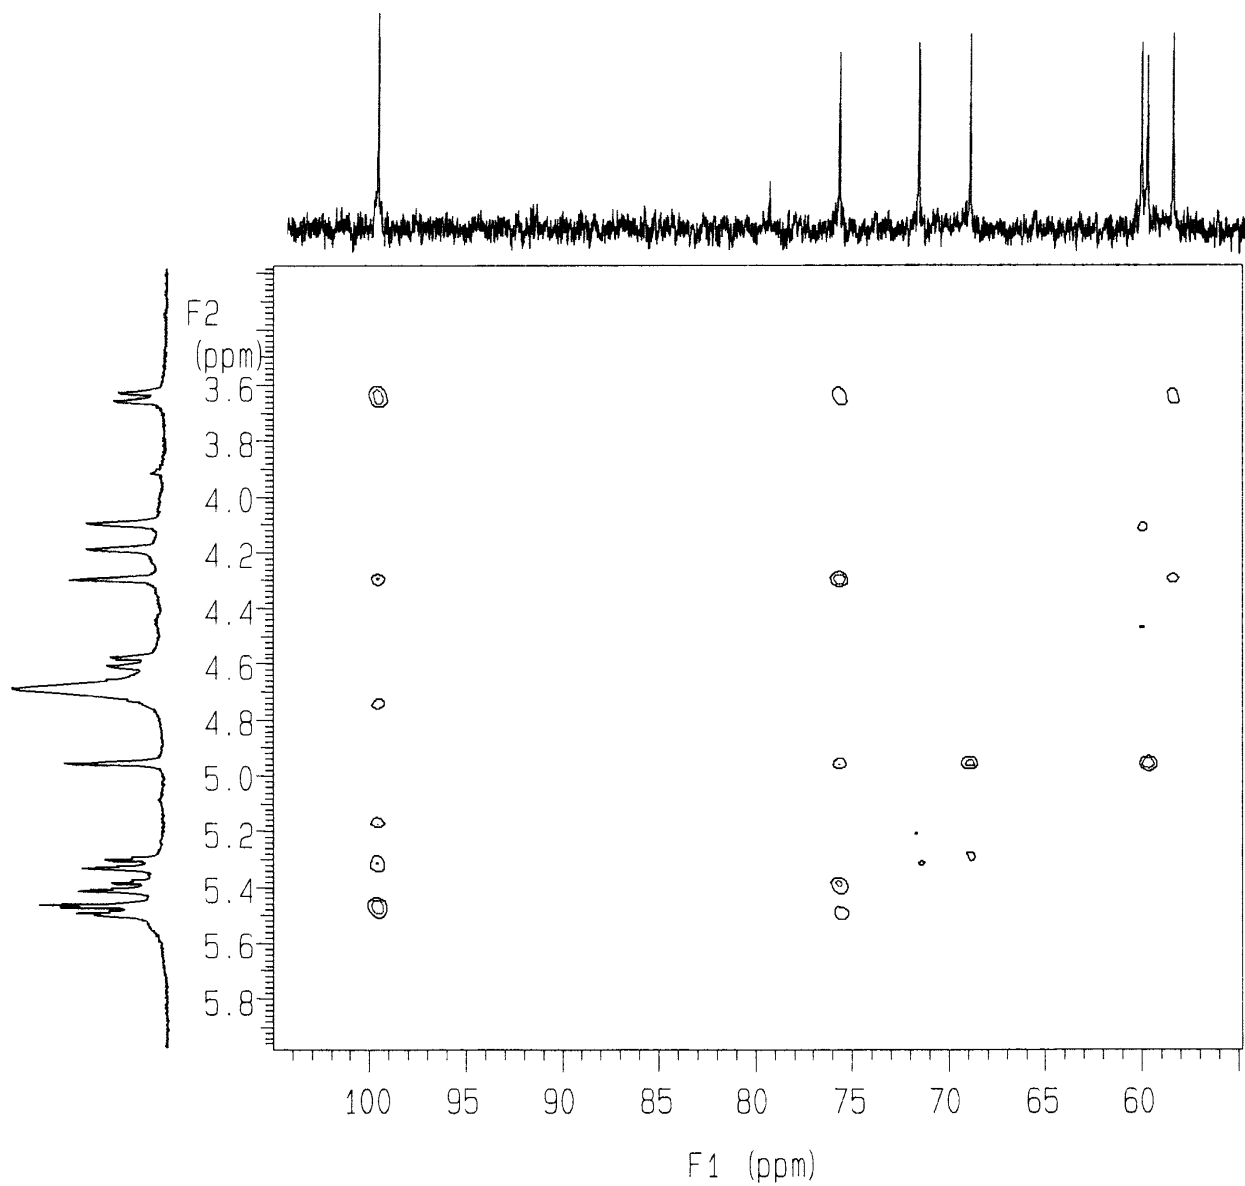

Figure S26. HMBC spectrum of **1** with  $\text{ZnCl}_2$  in  $\text{acetone-d}_6$ .

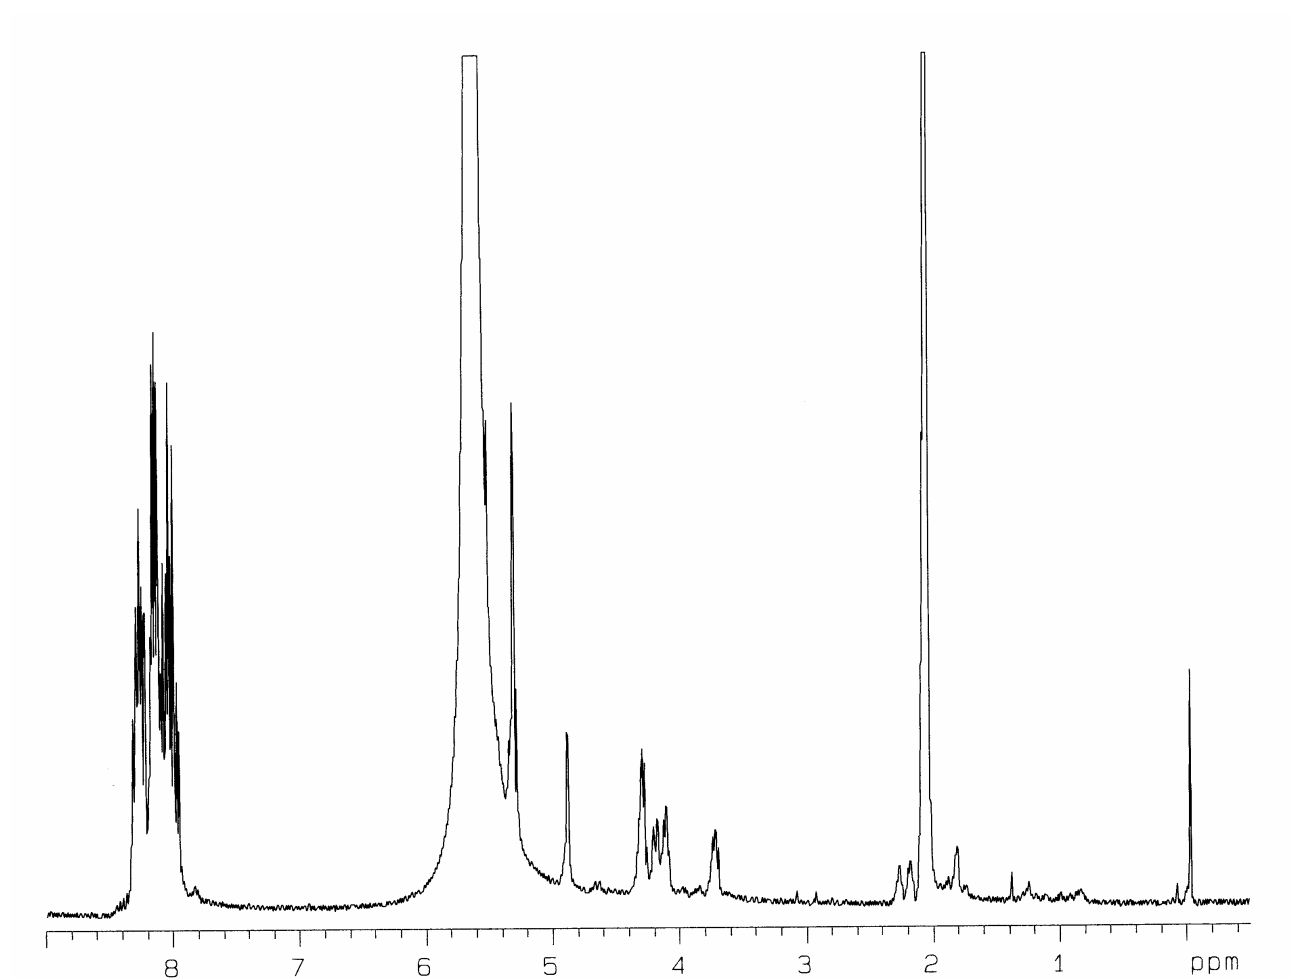

Figure S27.  $^1\text{H}$  NMR of **1** with  $\text{Mg}(\text{ClO}_4)_2$  in acetone- $\text{d}_6$ .

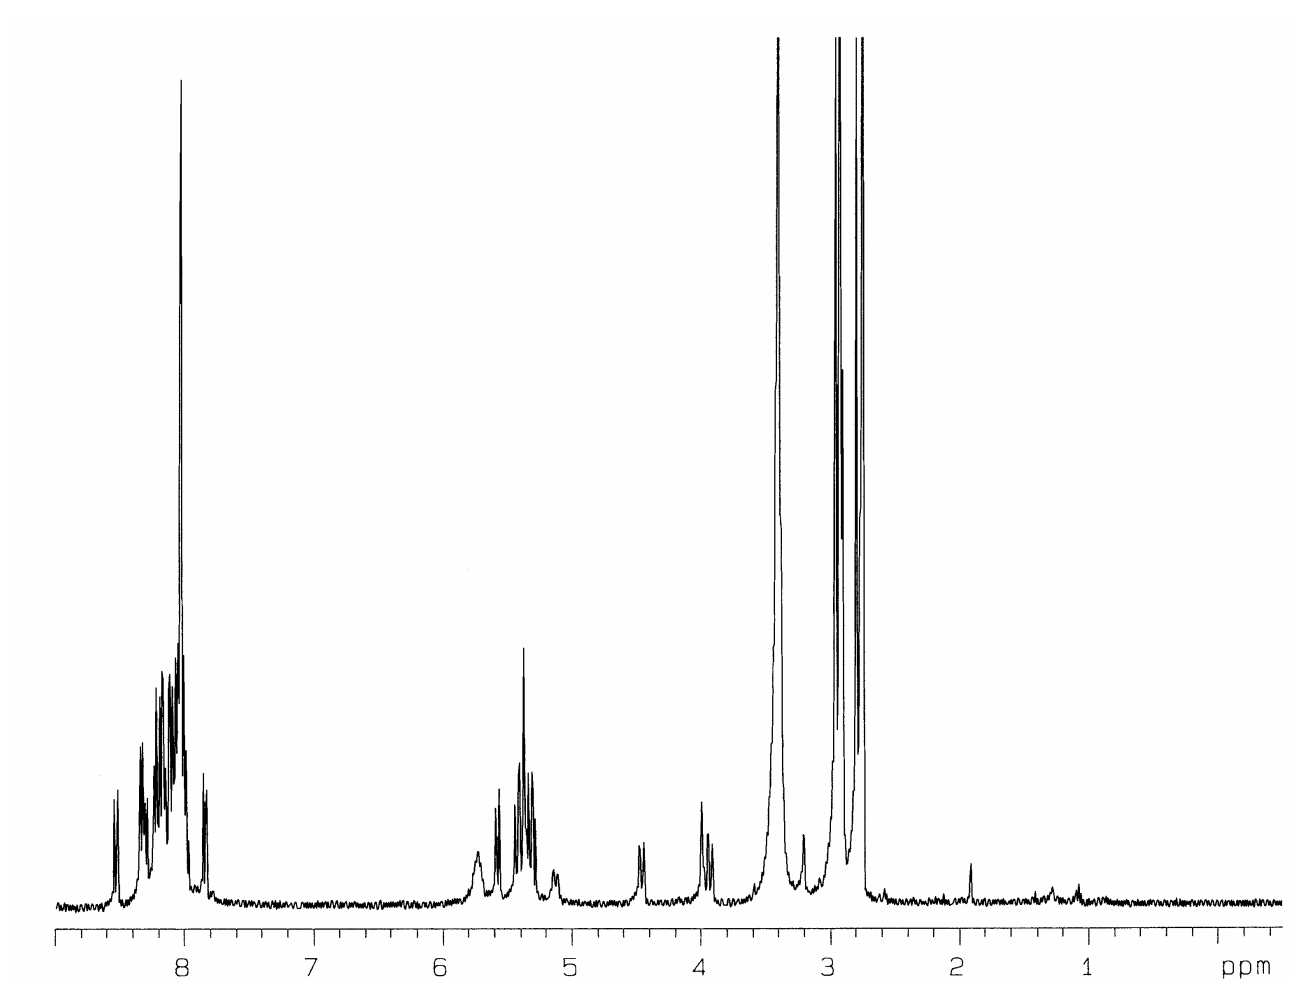

Figure S28.  $^1\text{H}$  NMR of **1-Pt** in  $\text{DMF-d}_7$ .

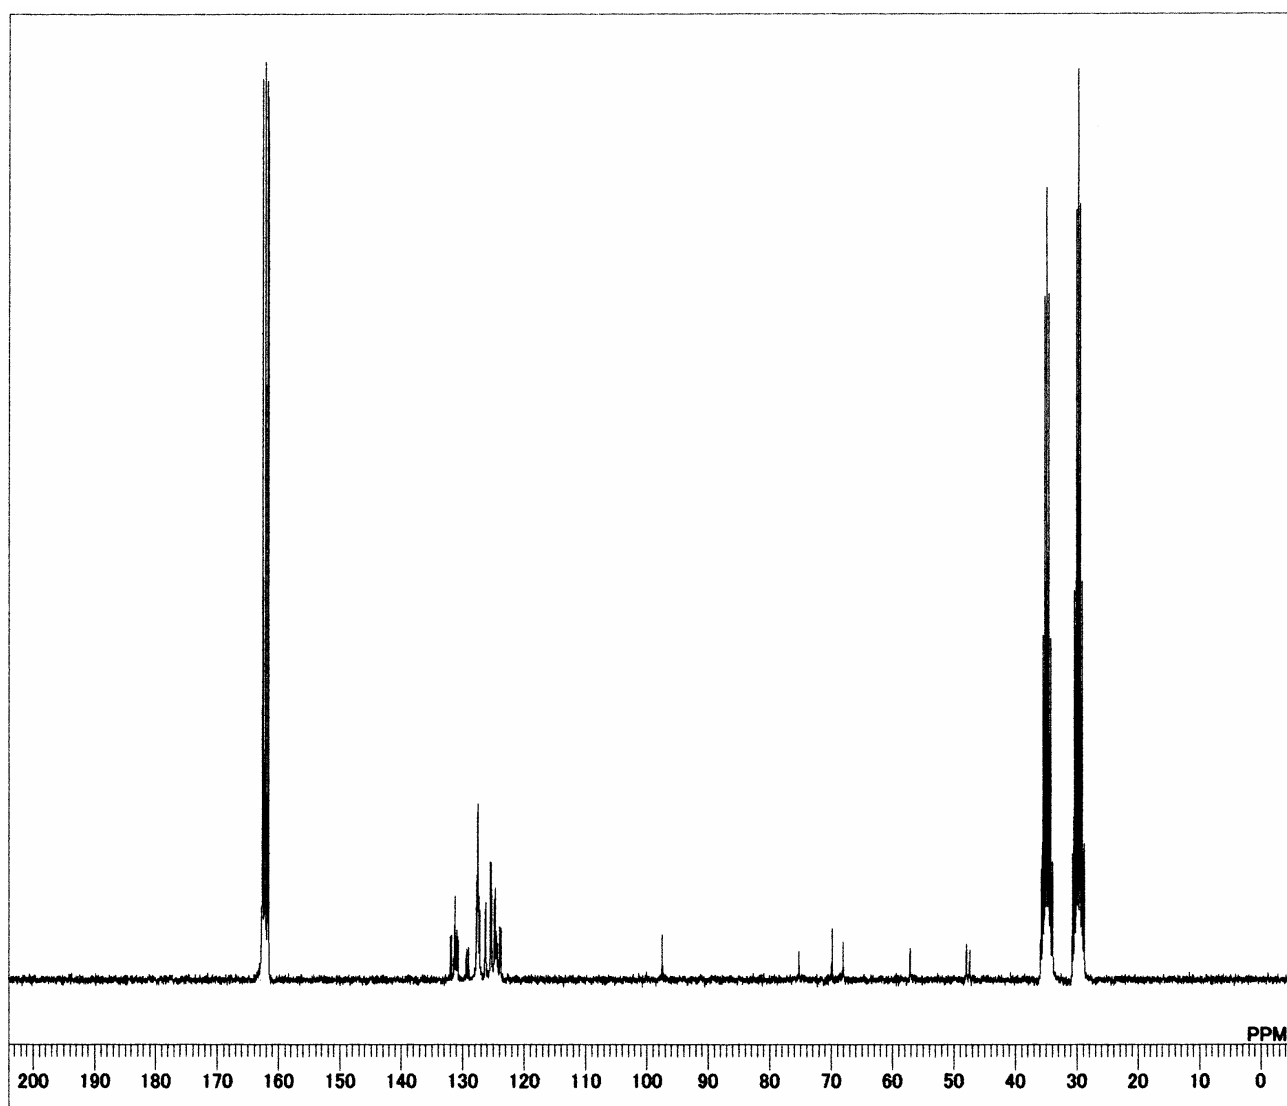

Figure S29.  $^{13}\text{C}$  NMR of **1-Pt** in  $\text{DMF-d}_7$ .

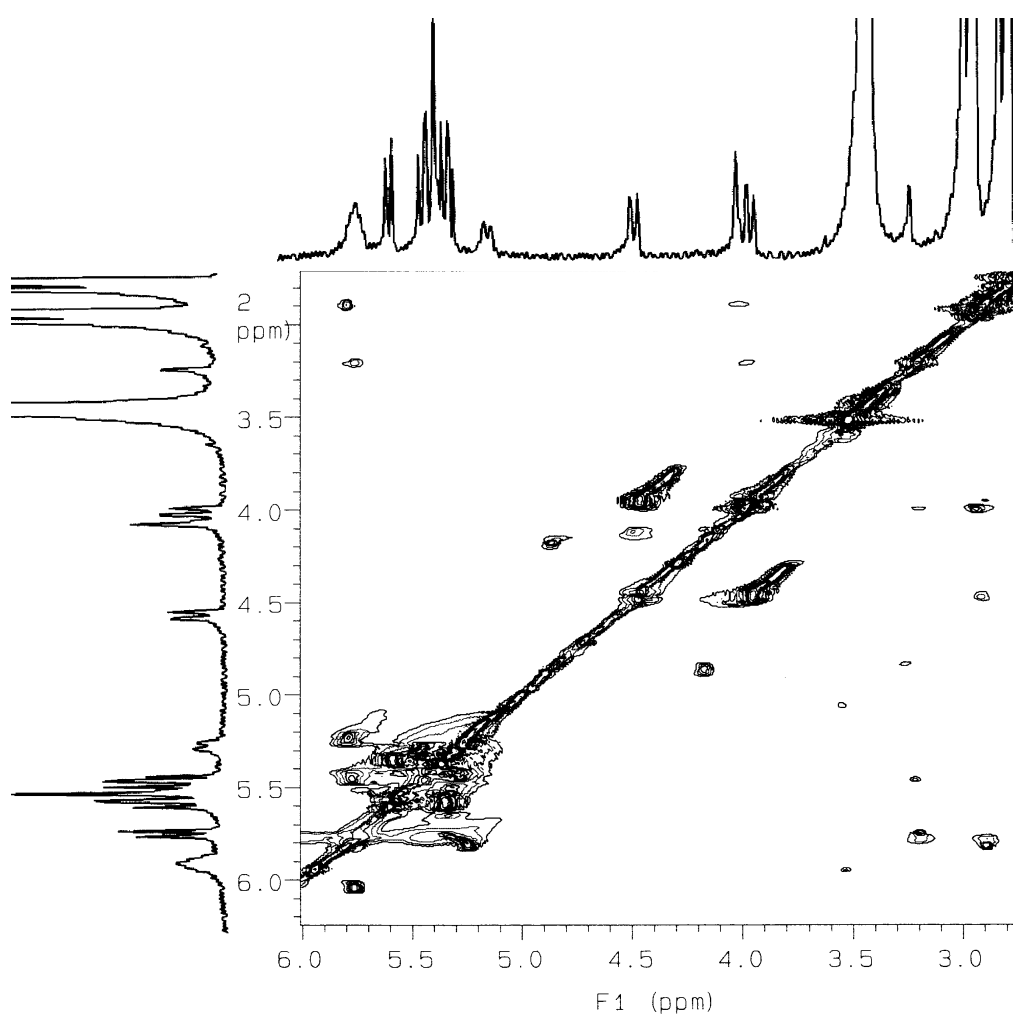

Figure S30. COSY spectrum of **1-Pt** in DMF-d<sub>7</sub>.

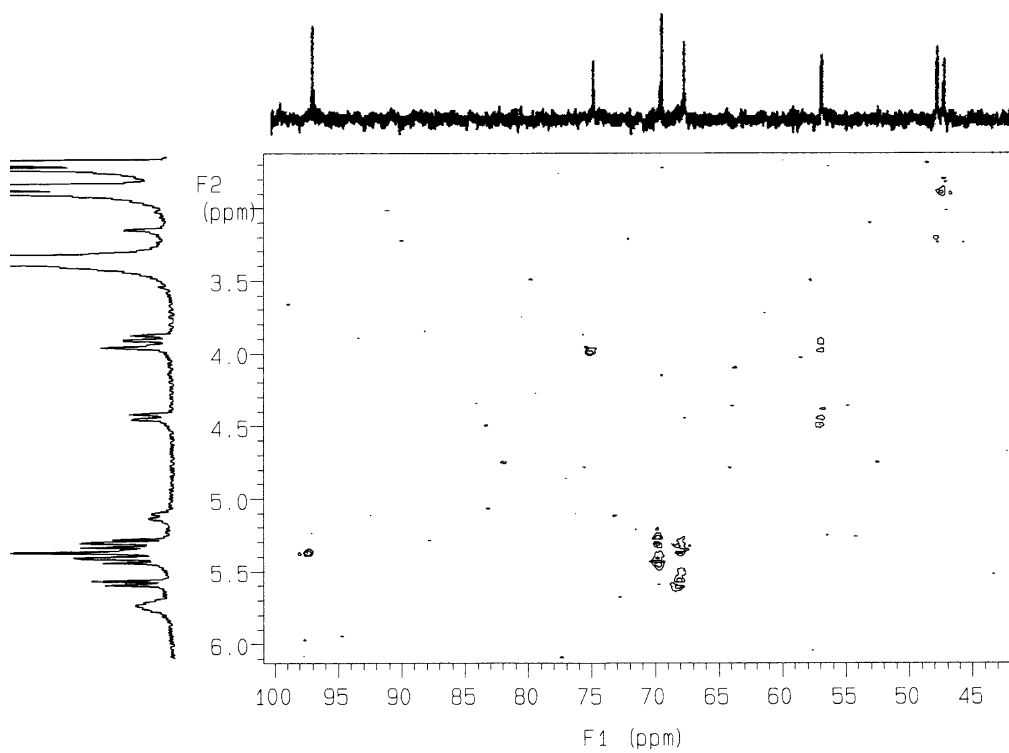

Figure S31. HMQC spectrum of **1-Pt** in DMF- $\text{d}_7$ .

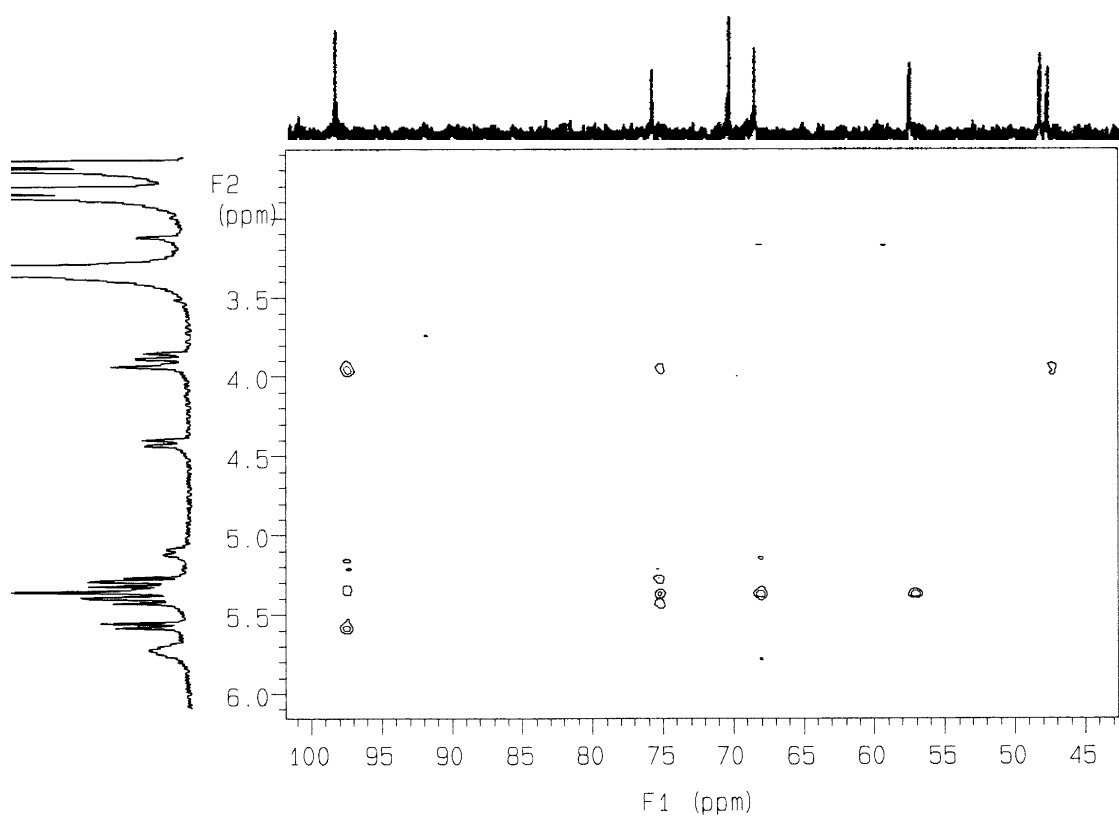

Figure S32. HMBC spectrum of **1-Pt** in DMF-d<sub>7</sub>.
